# Supplementary material for: Extracellular vesicles in infectious diseases caused by protozoan parasites in buffaloes
Source: PubMed Central journal article supplement (PMC7262785; doi:10.1590/1678-9199-jvatitd-2019-0067), 2020-05-29
Supplement: 1678-9199-jvatitd-26-e20190067-s1.pdf [file 1678-9199-jvatitd-26-e20190067-s1.pdf]

## Supplementary Material to “Extracellular vesicles in infectious diseases caused by protozoan parasites in buffaloes”

**Additional file 1.** Summary of extracellular vesicle proteins of *Theileria* spp. isolated from serum of positive buffaloes present in Fraction F3.

| Code access       | Description*                                      | MW [kDa] | Coverage | Unique peptides | Score       |
|-------------------|---------------------------------------------------|----------|----------|-----------------|-------------|
| <b>E1BNR0</b>     | Apolipoprotein                                    | 515.438  | 22.92533 | 89              | 371.6080978 |
| <b>Q2UVX4</b>     | Complement C3                                     | 187.135  | 38.83203 | 61              | 435.1392704 |
| <b>A0A0F6QNP7</b> | Complement component 3                            | 187.064  | 38.4106  | 60              | 432.9851233 |
| <b>G3X7A5</b>     | Complement C3                                     | 187.028  | 37.86875 | 60              | 422.0706013 |
| <b>B8Y9S9</b>     | Fibronectin 1                                     | 262.263  | 21.91035 | 33              | 124.5409169 |
| <b>G5E5A9</b>     | Fibronectin                                       | 271.952  | 20.17756 | 32              | 120.5719106 |
| <b>P07589</b>     | Fibronectin                                       | 271.983  | 20.17756 | 32              | 120.5719106 |
| <b>B8Y9T0</b>     | Fibronectin 1                                     | 248.974  | 21.11993 | 31              | 117.9743552 |
| <b>P15497</b>     | Apolipoprotein A-I                                | 30.258   | 61.88679 | 23              | 155.5061482 |
| <b>Q0VCM4</b>     | Glycogen phosphorylase                            | 97.394   | 22.56169 | 19              | 42.05386758 |
| <b>F1MI18</b>     | Uncharacterized protein                           | 165.654  | 14.81732 | 18              | 61.36519742 |
| <b>F1MJK3</b>     | Uncharacterized protein                           | 165.506  | 14.7973  | 18              | 61.36519742 |
| <b>A0A140T897</b> | Serum albumin                                     | 69.278   | 29.98353 | 17              | 64.88931954 |
| <b>P02769</b>     | Serum albumin                                     | 69.248   | 29.98353 | 17              | 64.88931954 |
| <b>P23805</b>     | Conglutinin                                       | 37.971   | 21.56334 | 17              | 227.0630013 |
| <b>P80457</b>     | Xanthine dehydrogenase/oxidase                    | 146.696  | 12.98799 | 16              | 34.40082884 |
| <b>F1MUT3</b>     | Xanthine dehydrogenase/oxidase                    | 146.669  | 12.98799 | 16              | 34.40082884 |
| <b>B0JYQ0</b>     | ALB protein                                       | 69.248   | 25.86491 | 15              | 57.46882677 |
| <b>F1MVP0</b>     | ADAM metalloproteinase with thrombospondin type 1 | 151.374  | 13.80042 | 15              | 63.02905428 |
| <b>F1N0R5</b>     | von Willebrand factor                             | 307.475  | 6.552707 | 14              | 48.45272136 |
| <b>F1MAV0</b>     | Fibrinogen beta chain                             | 56.405   | 36.36364 | 14              | 51.43162334 |
| <b>E1BH06</b>     | Uncharacterized protein                           | 192.644  | 21.65422 | 14              | 121.2117517 |
| <b>F5XVA9</b>     | von Willebrand factor                             | 307.745  | 6.548043 | 14              | 48.45272136 |

| Code access       | Description*                                           | MW [kDa] | Coverage | Unique peptides | Score       |
|-------------------|--------------------------------------------------------|----------|----------|-----------------|-------------|
| <b>P02676</b>     | Fibrinogen beta chain                                  | 53.306   | 33.76068 | 13              | 46.7038182  |
| <b>F1MY85</b>     | Complement C5a anaphylatoxin                           | 188.927  | 9.660107 | 13              | 35.12020373 |
| <b>V6F869</b>     | Apolipoprotein A-I-like                                | 23.629   | 51.44231 | 13              | 80.3775357  |
| <b>A0A0F6QMJ3</b> | Complement component 5                                 | 188.691  | 9.660107 | 13              | 35.12020373 |
| <b>F1N3Q7</b>     | Apolipoprotein A-IV                                    | 42.963   | 29.47368 | 12              | 51.3780371  |
| <b>Q32PJ2</b>     | Apolipoprotein A-IV                                    | 42.991   | 29.47368 | 12              | 51.3780371  |
| <b>G3N0I4</b>     | Cytosol aminopeptidas                                  | 54.047   | 34.73896 | 12              | 45.8811245  |
| <b>P00727</b>     | Cytosol aminopeptidas                                  | 56.254   | 33.33333 | 12              | 45.8811245  |
| <b>Q693V9</b>     | Complement component 3d                                | 34.422   | 40.26403 | 11              | 77.3899281  |
| <b>Q3MHL4</b>     | Adenosylhomocysteinase 3                               | 47.607   | 24.30556 | 10              | 32.89724624 |
| <b>P00432</b>     | Catalase                                               | 59.878   | 21.44213 | 10              | 34.88407671 |
| <b>Q7SIH1</b>     | Alpha-2-macroglobulin                                  | 167.47   | 22.45033 | 10              | 146.282555  |
| <b>Q95KV5</b>     | Fibronectin                                            | 38.32    | 42.07493 | 10              | 37.45227361 |
| <b>F1MQ37</b>     | Myosin heavy chain 9                                   | 226.962  | 6.364562 | 10              | 19.91305554 |
| <b>F1MD73</b>     | Uncharacterized protein                                | 189.978  | 16.90463 | 10              | 109.3602887 |
| <b>A5PJE3</b>     | Fibrinogen alpha chain                                 | 66.957   | 14.79675 | 10              | 49.72597051 |
| <b>P02672</b>     | Fibrinogen alpha chain                                 | 66.971   | 14.79675 | 10              | 49.72597051 |
| <b>A5D9E9</b>     | Complement C1r subcomponent precursor                  | 80.161   | 17.44681 | 9               | 32.06269646 |
| <b>Q03247</b>     | Apolipoprotein                                         | 35.958   | 26.58228 | 9               | 85.04481769 |
| <b>Q2TBU0</b>     | Haptoglobin                                            | 44.831   | 22.69327 | 9               | 26.58675003 |
| <b>E1BI98</b>     | Collagen type VI alpha 1 chain                         | 108.603  | 10.32132 | 9               | 20.81394196 |
| <b>G5E513</b>     | Uncharacterized protein                                | 49.939   | 45.95186 | 9               | 540.2513834 |
| <b>A6QPX7</b>     | FGB protein (Fragment)                                 | 37.907   | 37.57576 | 9               | 30.26272595 |
| <b>P01030</b>     | Complement C4                                          | 101.817  | 17.06522 | 9               | 43.73454607 |
| <b>E1B805</b>     | Uncharacterized protein                                | 187.149  | 6.09319  | 9               | 16.55716145 |
| <b>G3X6K8</b>     | Haptoglobin                                            | 44.845   | 22.69327 | 9               | 26.58675003 |
| <b>A0A140T881</b> | Apolipoprotein                                         | 36.017   | 26.58228 | 9               | 85.04481769 |
| <b>G3N3D4</b>     | Potassium channel tetramerization domain containing 12 | 35.701   | 28.52761 | 9               | 38.9555769  |
| <b>A7YWR0</b>     | Apolipoprotein                                         | 36.051   | 26.58228 | 9               | 85.04481769 |
| <b>E1BFN6</b>     | Dihydropyrimidinase                                    | 56.267   | 18.60465 | 9               | 32.63112199 |
| <b>P81187</b>     | Complement factor B                                    | 85.312   | 14.32326 | 8               | 22.24805796 |
| <b>P17697</b>     | Clusterin                                              | 51.081   | 13.66743 | 8               | 32.22156239 |
| <b>F1N076</b>     | Ceruloplasmin                                          | 123.731  | 12.53456 | 8               | 19.07722878 |

| Code access   | Description*                             | MW [kDa] | Coverage | Unique peptides | Score       |
|---------------|------------------------------------------|----------|----------|-----------------|-------------|
| <b>R9QSM8</b> | Alpha-2-macroglobulin                    | 133.302  | 25.95993 | 8               | 131.0675713 |
| <b>F1N514</b> | CD5 antigen-like precursor               | 50.305   | 15.89404 | 7               | 86.63707793 |
| <b>Q3SZZ9</b> | FGG protein                              | 49.136   | 18.3908  | 7               | 32.44846714 |
| <b>Q0VCX1</b> | Complement C1s subcomponent              | 76.56    | 8.853411 | 7               | 23.25133181 |
| <b>F1MJ12</b> | Complement C1s subcomponent              | 77.332   | 8.776978 | 7               | 23.25133181 |
| <b>F1MGU7</b> | Fibrinogen gamma-B chain                 | 50.2     | 18.05869 | 7               | 32.44846714 |
| <b>Q95KV4</b> | Fibronectin (Fragment)                   | 35.464   | 35.9375  | 7               | 25.80675912 |
| <b>Q3Y5Z3</b> | Adiponectin                              | 26.117   | 32.91667 | 7               | 28.58874869 |
| <b>Q0ZCB4</b> | Apolipoprotein                           | 27.057   | 29.95781 | 7               | 64.91904032 |
| <b>A2VDY5</b> | Hydroxysteroid (17-beta)                 | 28.378   | 37.40741 | 7               | 19.28046763 |
| <b>Q9MYP6</b> | 17-beta-hydroxysteroid dehydrogenas      | 28.404   | 37.40741 | 7               | 19.28046763 |
| <b>A6QNW7</b> | CD5L protein                             | 50.179   | 15.96452 | 7               | 86.63707793 |
| <b>Q5E9B1</b> | L-lactate dehydrogenase                  | 36.7     | 18.56287 | 6               | 8.872087121 |
| <b>B7FEK7</b> | 43kDa collectin                          | 33.594   | 10.28037 | 6               | 82.2378906  |
| <b>B0JYN3</b> | L-lactate dehydrogenase                  | 36.701   | 18.56287 | 6               | 8.872087121 |
| <b>Q28178</b> | Thrombospondin-1                         | 129.451  | 6.495726 | 6               | 9.785889983 |
| <b>A7E3W2</b> | Galectin-3-binding protein               | 62.087   | 12.07207 | 6               | 24.50829315 |
| <b>F1MKG2</b> | Collagen type VI alpha 2 chain           | 109.253  | 7.594937 | 6               | 13.22950125 |
| <b>B8Y898</b> | Malic enzyme                             | 63.853   | 16.11208 | 6               | 21.34723735 |
| <b>P02663</b> | Alpha-S2-casein                          | 26.002   | 27.02703 | 6               | 13.52538526 |
| <b>F1MC11</b> | Keratin, type I cytoskeletal 14          | 51.879   | 15.72327 | 6               | 28.12601042 |
| <b>A6QNZ7</b> | Keratin 10                               | 54.816   | 9.695817 | 6               | 23.54977572 |
| <b>P12799</b> | Fibrinogen gamma-B chain                 | 50.212   | 14.63964 | 6               | 26.34777749 |
| <b>Q3SYR8</b> | Immunoglobulin J chain                   | 17.846   | 22.92994 | 6               | 61.62939811 |
| <b>F1N3A1</b> | Thrombospondin-1                         | 129.309  | 6.495726 | 6               | 9.785889983 |
| <b>A7E3D5</b> | Proteasome subunit alpha type (Fragment) | 26.551   | 31.22363 | 6               | 18.23925734 |
| <b>K4JR81</b> | Alpha-2-macroglobulin variant 12         | 61.673   | 12.02873 | 6               | 35.65589309 |
| <b>Q3ZBG0</b> | Proteasome subunit alpha type-7          | 27.852   | 29.83871 | 6               | 18.23925734 |
| <b>F1MSZ6</b> | Antithrombin-III OS=Bos taurus           | 52.407   | 16.98925 | 6               | 26.68186378 |
| <b>P00735</b> | Prothrombin                              | 70.461   | 12.32    | 6               | 12.0139544  |
| <b>F1MFY6</b> | Collectin-43 precursor                   | 24.905   | 13.46939 | 6               | 82.2378906  |
| <b>Q58D62</b> | Fetuin-B                                 | 42.636   | 13.95349 | 6               | 9.815567017 |
| <b>P06394</b> | Keratin, type I cytoskeletal 10          | 54.815   | 9.695817 | 6               | 23.54977572 |

| Code access       | Description*                            | MW [kDa] | Coverage | Unique peptides | Score       |
|-------------------|-----------------------------------------|----------|----------|-----------------|-------------|
| <b>Q3SZJ0</b>     | Argininosuccinate lyase                 | 52.71    | 15.4334  | 5               | 13.05015182 |
| <b>G5E5C3</b>     | Proteasome subunit alpha type           | 27.267   | 20       | 5               | 10.13151824 |
| <b>F1MM86</b>     | Complement component C6                 | 104.455  | 4.828326 | 5               | 9.712654352 |
| <b>G3N0V2</b>     | Keratin 1                               | 63.113   | 8.085809 | 5               | 38.03936386 |
| <b>O02808</b>     | Von Willebrand factor (Fragment)        | 59.57    | 14.7541  | 5               | 21.56231964 |
| <b>Q3SYT3</b>     | Complement C1r subcomponent precursor   | 44.528   | 17.51269 | 5               | 19.45690751 |
| <b>Q2YDE4</b>     | Proteasome subunit alpha type-6         | 27.382   | 19.9187  | 5               | 10.13151824 |
| <b>F1MTV7</b>     | Argininosuccinate lyase                 | 52.682   | 15.4334  | 5               | 13.05015182 |
| <b>B8YB77</b>     | Malic enzyme                            | 63.332   | 13.55634 | 5               | 18.47211838 |
| <b>G3X6N3</b>     | Serotransferrin                         | 77.616   | 7.386364 | 5               | 9.215728402 |
| <b>Q5I597</b>     | Homocysteine                            | 44.85    | 15.23342 | 5               | 16.67927086 |
| <b>F1MRZ6</b>     | Tenascin C                              | 244.461  | 3.272075 | 5               | 9.360537648 |
| <b>G5E5T5</b>     | Uncharacterized protein                 | 42.442   | 54.24165 | 5               | 514.9136553 |
| <b>Q3SYR5</b>     | Apolipoprotein C-IV                     | 14.428   | 48.8189  | 5               | 32.75496709 |
| <b>Q29RU4</b>     | Complement component C6                 | 104.473  | 4.828326 | 5               | 9.712654352 |
| <b>Q3T063</b>     | Nicotinate-nucleotide pyrophosphorylase | 31.131   | 20.40134 | 5               | 16.96804833 |
| <b>E1BL29</b>     | Bleomycin hydrolase                     | 52.896   | 19.38998 | 5               | 23.60210347 |
| <b>Q29443</b>     | Serotransferrin                         | 77.703   | 7.386364 | 5               | 9.215728402 |
| <b>F1MHB8</b>     | Nicotinate-nucleotide pyrophosphorylase | 31.165   | 20.40134 | 5               | 16.96804833 |
| <b>P41361</b>     | Antithrombin-III                        | 52.314   | 14.83871 | 5               | 20.79067826 |
| <b>Q71U44</b>     | Fibronectin (Fragment)                  | 45.802   | 17.96117 | 5               | 26.43597722 |
| <b>A0JN60</b>     | Tenascin C                              | 190.961  | 4.180985 | 5               | 9.360537648 |
| <b>E1BH94</b>     | Peptidoglycan recognition protein 2     | 59.793   | 14.56835 | 5               | 21.18341041 |
| <b>F1MRZ5</b>     | Tenascin C                              | 191.032  | 4.180985 | 5               | 9.360537648 |
| <b>Q2KIV9</b>     | Complement C1q subcomponent subunit B   | 26.383   | 17.81377 | 4               | 17.81737649 |
| <b>Q28194</b>     | Thrombospondin-1                        | 25       | 21.83406 | 4               | 9.785889983 |
| <b>Q9TUQ0</b>     | Anion exchange protein                  | 95.582   | 4.561404 | 4               | 9.179233432 |
| <b>Q9TTK8</b>     | Creatine (phospho) kinase               | 46.867   | 15.86538 | 4               | 13.18331146 |
| <b>Q32KL2</b>     | Proteasome subunit beta type-5          | 28.591   | 20.91255 | 4               | 8.623464584 |
| <b>P63258</b>     | Actin, cytoplasmic 2                    | 41.766   | 14.66667 | 4               | 12.56157732 |
| <b>B5B3R8</b>     | Alpha S1 casein                         | 24.427   | 19.15888 | 4               | 23.83278966 |
| <b>A0A1B0Z542</b> | Heat shock 27 kDa protein 1             | 22.231   | 15.9204  | 4               | 8.032542706 |
| <b>Q9XSW5</b>     | Anion exchange protein                  | 104.308  | 4.193548 | 4               | 9.179233432 |

| Code access       | Description*                                   | MW [kDa] | Coverage | Unique peptides | Score       |
|-------------------|------------------------------------------------|----------|----------|-----------------|-------------|
| <b>F1MNW4</b>     | Inter-alpha-trypsin inhibitor heavy chain H2   | 106.09   | 6.236786 | 4               | 11.40782952 |
| <b>Q3MHF7</b>     | S-methyl-5'-thioadenosine phosphorylase        | 31.236   | 18.0212  | 4               | 8.752094269 |
| <b>F1N3V0</b>     | Malic enzyme                                   | 63.746   | 10.36907 | 4               | 16.47507405 |
| <b>F1MYN5</b>     | Fibulin-1                                      | 77.434   | 9.490085 | 4               | 13.97474813 |
| <b>A5D7S8</b>     | Fibulin-1                                      | 77.478   | 9.490085 | 4               | 13.97474813 |
| <b>A0A1C9EIX3</b> | Heat shock protein family B member 1 variant 1 | 22.351   | 15.9204  | 4               | 8.032542706 |
| <b>Q58DP7</b>     | Heat shock 27kDa protein 1                     | 17.545   | 20.64516 | 4               | 8.032542706 |
| <b>E9RHW1</b>     | Heat shock 27kDa protein 1                     | 22.379   | 15.9204  | 4               | 8.032542706 |
| <b>Q3T0X5</b>     | Proteasome subunit alpha type-1                | 29.567   | 16.73004 | 4               | 15.45982051 |
| <b>P02662</b>     | Alpha-S1-casein                                | 24.513   | 19.15888 | 4               | 23.83278966 |
| <b>P60712</b>     | Actin, cytoplasmic 1                           | 41.71    | 14.66667 | 4               | 12.56157732 |
| <b>P31976</b>     | Ezrin                                          | 68.717   | 5.851979 | 4               | 6.883066654 |
| <b>Q3ZCK9</b>     | Proteasome subunit alpha type-4                | 29.465   | 15.32567 | 4               | 9.53579998  |
| <b>Q9TUQ1</b>     | Anion exchange protein                         | 74.3     | 5.882353 | 4               | 9.179233432 |
| <b>A0A1C9EIX6</b> | Heat shock protein family B member 1 variant 2 | 22.389   | 15.9204  | 4               | 8.032542706 |
| <b>A5D984</b>     | Pyruvate kinase                                | 57.912   | 12.05273 | 4               | 12.27132821 |
| <b>Q28085</b>     | Complement factor H                            | 140.282  | 3.964401 | 4               | 7.379358768 |
| <b>F1MC45</b>     | Complement factor H precursor                  | 96.53    | 5.875441 | 4               | 7.059792042 |
| <b>F1MRD0</b>     | Actin, cytoplasmic 1                           | 41.825   | 14.66667 | 4               | 12.56157732 |
| <b>Q9BGI2</b>     | Peroxiredoxin-4                                | 30.722   | 25.18248 | 4               | 19.38334894 |
| <b>Q3ZC87</b>     | Pyruvate kinase (Fragment)                     | 61.389   | 11.32743 | 4               | 12.27132821 |
| <b>E1BEL7</b>     | Heat shock protein beta-1                      | 22.564   | 15.76355 | 4               | 8.032542706 |
| <b>Q7M2T6</b>     | Band 3 anion transport protein (Fragments)     | 34.3     | 12.7451  | 4               | 9.179233432 |
| <b>A5D7R6</b>     | ITIH2 protein                                  | 106.12   | 6.236786 | 4               | 11.40782952 |
| <b>G3X7S2</b>     | Heat shock protein beta-1                      | 17.432   | 20.77922 | 4               | 8.032542706 |
| <b>Q1JQB0</b>     | Collagen type VI alpha 2 chain                 | 97.075   | 4.907306 | 4               | 7.107832909 |
| <b>Q6T182</b>     | Sex hormone-binding globulin (Fragment)        | 40.069   | 13.74663 | 3               | 8.049062967 |
| <b>Q29RQ1</b>     | Complement component C7                        | 93.029   | 3.677343 | 3               | 6.569371939 |
| <b>G5E5H7</b>     | Uncharacterized protein                        | 19.898   | 21.34831 | 3               | 5.753308058 |
| <b>K4JF16</b>     | Alpha-2-macroglobulin variant 23               | 101.296  | 25.77434 | 3               | 99.956056   |
| <b>Q2HJ86</b>     | Tubulin alpha-1D chain                         | 50.251   | 9.292035 | 3               | 7.207318544 |
| <b>P81947</b>     | Tubulin alpha-1B chain                         | 50.12    | 9.312639 | 3               | 7.207318544 |
| <b>A3KLR9</b>     | Superoxide dismutase [Cu-Zn]                   | 26.16    | 16.59751 | 3               | 11.58625424 |

| Code access       | Description*                                 | MW [kDa] | Coverage | Unique peptides | Score       |
|-------------------|----------------------------------------------|----------|----------|-----------------|-------------|
| <b>E1BFN5</b>     | Uncharacterized protein                      | 78.333   | 4.803493 | 3               | 4.643848658 |
| <b>Q1RML9</b>     | Platelet-activating factor acetylhydrolas    | 50.119   | 7.882883 | 3               | 8.153270364 |
| <b>Q05B55</b>     | IGK protein                                  | 26.574   | 12.08333 | 3               | 10.89561057 |
| <b>Q32KN8</b>     | Tubulin alpha-3 chain                        | 49.894   | 9.333333 | 3               | 7.207318544 |
| <b>Q6KDN5</b>     | Complement component 3 (Fragment)            | 7.414    | 46.03175 | 3               | 10.34847975 |
| <b>F1MNV5</b>     | Kininogen-1                                  | 48.391   | 6.192661 | 3               | 9.142725945 |
| <b>Q17QL7</b>     | KRT15 protein                                | 48.969   | 7.284768 | 3               | 7.44270277  |
| <b>K4JR88</b>     | Alpha-2-macroglobulin variant 22             | 77.345   | 34.87699 | 3               | 86.96624315 |
| <b>B5B0D4</b>     | Major allergen beta-lactoglobulin            | 19.956   | 21.34831 | 3               | 5.753308058 |
| <b>F1MH40</b>     | Uncharacterized protein                      | 26.318   | 12.08333 | 3               | 10.89561057 |
| <b>K4JDR8</b>     | Alpha-2-macroglobulin variant 5              | 45.046   | 9.558824 | 3               | 20.09559512 |
| <b>A1L595</b>     | Keratin, type I cytoskeletal 17              | 48.682   | 9.297052 | 3               | 16.26480794 |
| <b>A0A140T8C8</b> | Kininogen-1                                  | 68.922   | 4.347826 | 3               | 9.142725945 |
| <b>P01044</b>     | Kininogen-1                                  | 68.847   | 4.347826 | 3               | 9.142725945 |
| <b>G3X6I0</b>     | Uncharacterized protein                      | 202.852  | 2.190923 | 3               | 10.26765418 |
| <b>F1N045</b>     | Complement component C7                      | 92.929   | 3.677343 | 3               | 6.569371939 |
| <b>Q2HJ49</b>     | Moesin                                       | 67.933   | 4.506066 | 3               | 4.27545166  |
| <b>F2Z4C1</b>     | Tubulin alpha chain                          | 50.104   | 9.312639 | 3               | 7.207318544 |
| <b>P81644</b>     | Apolipoprotein A-II                          | 11.195   | 16       | 3               | 6.495168686 |
| <b>A0A140T867</b> | Keratin, type I cytoskeletal 17              | 48.712   | 9.297052 | 3               | 16.26480794 |
| <b>Q32LP2</b>     | Radixin                                      | 68.525   | 4.459691 | 3               | 4.27545166  |
| <b>F1MMP5</b>     | Inter-alpha-trypsin inhibitor heavy chain H1 | 101.174  | 4.856512 | 3               | 8.193274856 |
| <b>A5PKC2</b>     | SHBG protein                                 | 43.288   | 12.7182  | 3               | 8.049062967 |
| <b>P56652</b>     | Inter-alpha-trypsin inhibitor heavy chain H3 | 99.489   | 3.142536 | 3               | 4.84053421  |
| <b>F6RP72</b>     | Tubulin alpha chain                          | 49.797   | 9.35412  | 3               | 7.207318544 |
| <b>Q28017</b>     | Platelet-activating factor acetylhydrolas    | 50.101   | 7.882883 | 3               | 8.153270364 |
| <b>O46415</b>     | Ferritin light chain                         | 19.975   | 28.57143 | 3               | 6.997107744 |
| <b>M0QVY0</b>     | Uncharacterized protein                      | 60.767   | 8.056042 | 3               | 20.52165961 |
| <b>E1BD83</b>     | Proteasome subunit alpha type                | 29.184   | 14.94253 | 3               | 10.5631783  |
| <b>O02717</b>     | Non-muscle myosin heavy chain (Fragment)     | 72.327   | 6.4      | 3               | 7.038524389 |
| <b>Q27991</b>     | Myosin-10                                    | 228.958  | 2.176113 | 3               | 4.014223576 |
| <b>P01966</b>     | Hemoglobin subunit alpha                     | 15.175   | 23.94366 | 3               | 8.103943825 |
| <b>G5E604</b>     | Uncharacterized protein                      | 11.051   | 37.38318 | 3               | 69.19117427 |

| Code access   | Description*                                 | MW [kDa] | Coverage | Unique peptides | Score       |
|---------------|----------------------------------------------|----------|----------|-----------------|-------------|
| <b>P02754</b> | Beta-lactoglobulin                           | 19.87    | 21.34831 | 3               | 5.753308058 |
| <b>K4JBA2</b> | Alpha-2-macroglobulin variant 9              | 43.75    | 9.823678 | 3               | 20.09559512 |
| <b>A4FV94</b> | KRT6A protein                                | 60.783   | 8.056042 | 3               | 20.52165961 |
| <b>B0JYP6</b> | IGK protein                                  | 26.304   | 12.08333 | 3               | 10.89561057 |
| <b>K4JBR5</b> | Alpha-2-macroglobulin variant 1              | 115.118  | 23.01741 | 3               | 92.61506844 |
| <b>Q0VCM5</b> | Inter-alpha-trypsin inhibitor heavy chain H1 | 101.173  | 4.856512 | 3               | 8.193274856 |
| <b>P01045</b> | Kininogen-2                                  | 68.666   | 4.361874 | 3               | 9.142725945 |
| <b>Q2TBX6</b> | Proteasome subunit beta type-1               | 26.229   | 14.93776 | 3               | 7.121225834 |
| <b>Q05443</b> | Lumican                                      | 38.732   | 8.187135 | 3               | 5.71127522  |
| <b>G3N0S9</b> | Uncharacterized protein                      | 22.321   | 6.532663 | 3               | 48.70267165 |
| <b>P34955</b> | Alpha-1-antiproteinase                       | 46.075   | 8.894231 | 3               | 4.713701844 |
| <b>P19035</b> | Apolipoprotein C-III                         | 10.685   | 31.25    | 3               | 8.54306221  |
| <b>F1MZ96</b> | Uncharacterized protein                      | 26.545   | 12.08333 | 3               | 10.89561057 |
| <b>P33672</b> | Proteasome subunit beta type-3               | 22.977   | 18.04878 | 3               | 7.05782795  |
| <b>E1BB91</b> | Collagen type VI alpha 3 chain               | 342.197  | 1.26183  | 3               | 5.710998774 |
| <b>F2Z4K0</b> | Tubulin alpha chain                          | 49.928   | 9.333333 | 3               | 7.207318544 |
| <b>P63103</b> | 14-3-3 protein zeta/delta                    | 27.728   | 18.36735 | 3               | 6.231706738 |
| <b>F1MJJ8</b> | Radixin                                      | 68.541   | 4.459691 | 3               | 4.27545166  |
| <b>G5E589</b> | Proteasome subunit beta type                 | 26.301   | 14.93776 | 3               | 7.121225834 |
| <b>Q3ZCJ7</b> | Tubulin alpha-1C chain                       | 49.825   | 9.35412  | 3               | 7.207318544 |
| <b>Q32LE5</b> | Isoaspartyl peptidase/L-asparaginase         | 32.03    | 11.03896 | 3               | 6.509634972 |
| <b>K4JDS3</b> | Alpha-2-macroglobulin variant 10             | 52.304   | 8.245243 | 3               | 20.09559512 |
| <b>Q687I9</b> | Purine nucleoside phosphorylase              | 32.046   | 10.38062 | 2               | 4.573058486 |
| <b>F1MVJ8</b> | Olfactomedin 4                               | 57.76    | 6.090373 | 2               | 5.155620337 |
| <b>F1MJH1</b> | Gelsolin                                     | 80.653   | 3.283174 | 2               | 2.386954308 |
| <b>G3X8C8</b> | Uncharacterized protein                      | 25.166   | 13.15789 | 2               | 4.573058486 |
| <b>P62739</b> | Actin, aortic smooth muscle                  | 41.982   | 7.161804 | 2               | 7.369176388 |
| <b>Q28921</b> | Alpha 1-antichymotrypsin (Fragment)          | 28.553   | 7.539683 | 2               | 5.066781759 |
| <b>Q28007</b> | Dihydropyrimidine dehydrogenase [NADP(+)]    | 111.625  | 2.439024 | 2               | 1.998378515 |
| <b>Q3SX14</b> | Gelsolin                                     | 80.681   | 3.283174 | 2               | 2.386954308 |
| <b>Q9XTA3</b> | Myocilin                                     | 54.853   | 3.265306 | 2               | 2.534399986 |
| <b>A2I7M9</b> | Serpin A3-2                                  | 46.208   | 4.622871 | 2               | 5.066781759 |
| <b>B0JYK6</b> | Alpha-1,4 glucan phosphorylase               | 97.227   | 1.781473 | 2               | 5.125619888 |

| Code access       | Description*                                                                   | MW [kDa] | Coverage | Unique peptides | Score       |
|-------------------|--------------------------------------------------------------------------------|----------|----------|-----------------|-------------|
| <b>Q1JPD0</b>     | Complement component 8, alpha polypeptide (Fragment)                           | 32.621   | 7.291667 | 2               | 1.965626001 |
| <b>P80012</b>     | von Willebrand factor (Fragment)                                               | 102.531  | 2.66809  | 2               | 5.914143801 |
| <b>Q862P9</b>     | Similar to beta actin (Fragment)                                               | 20.968   | 13.82979 | 2               | 4.352330446 |
| <b>F1MKC4</b>     | Actin, gamma-enteric smooth muscle                                             | 41.898   | 7.180851 | 2               | 7.369176388 |
| <b>Q2KIH5</b>     | Complement component 8, alpha polypeptide                                      | 66.292   | 3.565365 | 2               | 1.965626001 |
| <b>G3MXU3</b>     | Collagen type VI alpha 2 chain                                                 | 24.991   | 14.41048 | 2               | 6.121668339 |
| <b>G3N126</b>     | Collagen type VI alpha 3 chain                                                 | 134.797  | 2.261712 | 2               | 3.278194427 |
| <b>A0A140T871</b> | Glutamate dehydrogenase 1, mitochondrial                                       | 61.592   | 6.238859 | 2               | 4.960487604 |
| <b>Q58DU5</b>     | Proteasome subunit alpha type-3                                                | 28.387   | 9.411765 | 2               | 6.971746206 |
| <b>F1MJ28</b>     | Alpha-1,4 glucan phosphorylase                                                 | 97.218   | 1.781473 | 2               | 5.125619888 |
| <b>Q3T186</b>     | Ribose-5-phosphate isomerase                                                   | 28.735   | 11.36364 | 2               | 6.911178589 |
| <b>Q8SPJ1</b>     | Junction plakoglobin                                                           | 81.769   | 3.355705 | 2               | 5.31604743  |
| <b>A6QQC9</b>     | OLFM4 protein (Fragment)                                                       | 49.706   | 7.159353 | 2               | 5.155620337 |
| <b>Q28908</b>     | Mucin (Fragment)                                                               | 54.83    | 8.730159 | 2               | 26.6109134  |
| <b>F1MX87</b>     | Complement C8 alpha chain                                                      | 66.234   | 3.565365 | 2               | 1.965626001 |
| <b>H9KUV2</b>     | S-methyl-5'-thioadenosine phosphorylase                                        | 32.883   | 10.20408 | 2               | 2.552754164 |
| <b>G3N1U4</b>     | Serpin A3-3                                                                    | 46.127   | 4.622871 | 2               | 5.066781759 |
| <b>F1MNF8</b>     | Tubulin alpha chain                                                            | 49.87    | 6.23608  | 2               | 5.16932559  |
| <b>A3FJ56</b>     | Kappa casein (Fragment)                                                        | 17.836   | 17.5     | 2               | 10.58230782 |
| <b>Q705V4</b>     | Kappa-casein (Fragment)                                                        | 17.693   | 17.61006 | 2               | 10.58230782 |
| <b>Q0VCX2</b>     | Endoplasmic reticulum chaperone BiP                                            | 72.356   | 3.358779 | 2               | 0           |
| <b>A5D7L1</b>     | C-type lectin domain containing 11A                                            | 35.593   | 6.17284  | 2               | 4.870718479 |
| <b>Q3T052</b>     | Inter-alpha-trypsin inhibitor heavy chain H4                                   | 101.449  | 1.965066 | 2               | 4.293653488 |
| <b>F1N549</b>     | Dihydropyrimidine dehydrogenas                                                 | 111.766  | 2.439024 | 2               | 1.998378515 |
| <b>G5E534</b>     | Ribose-5-phosphate isomerase                                                   | 32.82    | 9.803922 | 2               | 6.911178589 |
| <b>Q3ZC07</b>     | Actin, alpha cardiac muscle                                                    | 41.992   | 7.161804 | 2               | 7.369176388 |
| <b>Q2KJF1</b>     | Alpha-1B-glycoprotein                                                          | 53.52    | 4.970179 | 2               | 4.54270792  |
| <b>Q5EA67</b>     | Inter-alpha (Globulin) inhibitor H4 (Plasma Kallikrein-sensitive glycoprotein) | 101.446  | 1.965066 | 2               | 4.293653488 |
| <b>Q3B7M9</b>     | Glycogen phosphorylase                                                         | 96.279   | 1.779359 | 2               | 5.125619888 |
| <b>F1N1I6</b>     | Gelsolin                                                                       | 85.634   | 3.072983 | 2               | 2.386954308 |
| <b>O46375</b>     | Transthyretin                                                                  | 15.717   | 9.52381  | 2               | 7.818257093 |
| <b>F1N0I3</b>     | Coagulation factor V                                                           | 222.078  | 1.167513 | 2               | 5.12988162  |



| Code access       | Description*                                      | MW [kDa] | Coverage | Unique peptides | Score       |
|-------------------|---------------------------------------------------|----------|----------|-----------------|-------------|
| <b>P02081</b>     | Hemoglobin fetal subunit beta                     | 15.849   | 16.55172 | 2               | 20.82257354 |
| <b>P02668</b>     | Kappa-casein                                      | 21.256   | 14.73684 | 2               | 10.58230782 |
| <b>B8YB76</b>     | Homogentisat                                      | 49.965   | 6.741573 | 2               | 1.600483537 |
| <b>Q9TTE1</b>     | Serpin A3-1                                       | 46.208   | 4.622871 | 2               | 5.066781759 |
| <b>P81948</b>     | Tubulin alpha-4A chain                            | 49.892   | 7.142857 | 2               | 4.593021393 |
| <b>Q3SX06</b>     | Myocilin                                          | 54.854   | 3.265306 | 2               | 2.534399986 |
| <b>F1MU24</b>     | Alpha-1,4 glucan phosphorylase                    | 76.125   | 2.248876 | 2               | 5.125619888 |
| <b>P68138</b>     | Actin, alpha skeletal muscle                      | 42.024   | 7.161804 | 2               | 7.369176388 |
| <b>F1MXQ3</b>     | FAM20C, golgi associated secretory pathway kinase | 61.848   | 5.797101 | 2               | 0           |
| <b>A8YXZ2</b>     | C8G protein                                       | 25.272   | 13.08017 | 2               | 5.495295286 |
| <b>A2I7N1</b>     | Serpin A3-5                                       | 46.368   | 4.622871 | 2               | 5.066781759 |
| <b>Q3ZBS7</b>     | Vitronectin                                       | 53.541   | 5.252101 | 2               | 4.90358305  |
| <b>D4QBB4</b>     | Globin A1                                         | 15.944   | 44.13793 | 2               | 32.65024436 |
| <b>A5D7Q2</b>     | Uncharacterized protein                           | 51.638   | 3.49076  | 2               | 4.678791761 |
| <b>M0QVZ6</b>     | Keratin, type II cytoskeletal 5                   | 60.629   | 9.598604 | 2               | 28.92585468 |
| <b>Q2KIH3</b>     | HGD protein (Fragment)                            | 44.278   | 7.792208 | 2               | 1.600483537 |
| <b>Q5E9B5</b>     | Actin, gamma-enteric smooth muscle                | 41.85    | 7.180851 | 2               | 7.369176388 |
| <b>Q3ZEJ6</b>     | Serpin A3-3                                       | 46.297   | 4.622871 | 2               | 5.066781759 |
| <b>Q58DT9</b>     | Alpha 2 actin                                     | 45.192   | 6.633907 | 2               | 7.369176388 |
| <b>G3N1Y3</b>     | Uncharacterized protein                           | 12.966   | 20.51282 | 2               | 20.82257354 |
| <b>P19858</b>     | L-lactate                                         | 36.574   | 6.626506 | 2               | 4.39744246  |
| <b>Q9MYV8</b>     | Haptoglobin (Fragment)                            | 11.232   | 15       | 2               | 3.76282239  |
| <b>G3N3E4</b>     | Collagen type VI alpha 3 chain                    | 185.721  | 1.644157 | 2               | 3.278194427 |
| <b>Q32L76</b>     | Serum amyloid A-4 protein                         | 14.678   | 20.15504 | 2               | 4.796698689 |
| <b>G8JKX4</b>     | Actin, aortic smooth muscle                       | 45.403   | 6.650246 | 2               | 7.369176388 |
| <b>A0A0M4FJ17</b> | Kappa-casein (Fragment)                           | 16.015   | 19.31034 | 2               | 10.58230782 |
| <b>P55859</b>     | Purine nucleoside phosphorylase                   | 32.016   | 10.38062 | 2               | 4.573058486 |
| <b>F1N614</b>     | 78 kDa glucose-regulated protein precursor        | 66.224   | 3.666667 | 2               | 0           |
| <b>A5D7M6</b>     | KRT5 protein                                      | 62.644   | 9.21273  | 2               | 28.92585468 |
| <b>Q27983</b>     | Alpha1-antichymotrypsin isoform pHHK11 (Fragment) | 22.697   | 9.359606 | 2               | 5.066781759 |
| <b>A6QPD4</b>     | LOC790886 protein                                 | 45.399   | 6.582278 | 2               | 4.617819786 |
| <b>F1MMD7</b>     | Inter-alpha-trypsin inhibitor heavy chain H4      | 101.463  | 1.965066 | 2               | 4.293653488 |
| <b>A4IFM8</b>     | Actin, alpha 1, skeletal muscle                   | 41.996   | 7.161804 | 2               | 7.369176388 |

| Code access       | Description*                               | MW [kDa] | Coverage | Unique peptides | Score       |
|-------------------|--------------------------------------------|----------|----------|-----------------|-------------|
| <b>A2I7N0</b>     | Serpin A3-4                                | 46.282   | 4.622871 | 2               | 5.066781759 |
| <b>F1MLF8</b>     | Homogentisat                               | 49.811   | 6.772009 | 2               | 1.600483537 |
| <b>P81265</b>     | Polymeric immunoglobulin receptor          | 82.383   | 3.698811 | 2               | 5.614470482 |
| <b>A2I7N2</b>     | Serpin A3-6                                | 46.361   | 4.589372 | 2               | 5.066781759 |
| <b>K4JB97</b>     | Alpha-2-macroglobulin variant 4            | 42.306   | 7.310705 | 2               | 15.2149837  |
| <b>A0A140T8A9</b> | Kappa-casein                               | 21.224   | 14.73684 | 2               | 10.58230782 |
| <b>Q28107</b>     | Coagulation factor V                       | 248.828  | 1.040253 | 2               | 5.12988162  |
| <b>Q0P5J4</b>     | Keratin, type I cytoskeletal 25            | 49.282   | 2.222222 | 2               | 6.499523044 |
| <b>A5D7J0</b>     | ACTA2 protein                              | 42.01    | 7.161804 | 2               | 7.369176388 |
| <b>P00366</b>     | Glutamate dehydrogenas                     | 61.473   | 6.272401 | 2               | 4.960487604 |
| <b>Q3ZC00</b>     | Lymphocyte cytosolic protein 1 (L-plastin) | 70.01    | 3.668262 | 2               | 2.719077349 |
| <b>Q148H6</b>     | Keratin, type I cytoskeletal 28            | 50.744   | 2.155172 | 2               | 6.499523044 |
| <b>G8JKW7</b>     | Uncharacterized protein                    | 46.315   | 4.61165  | 2               | 5.066781759 |
| <b>Q9MZ31</b>     | Fibronectin variable region (Fragment)     | 20.365   | 19.35484 | 2               | 5.509114504 |
| <b>Q2HJB8</b>     | Tubulin alpha-8 chain                      | 50.022   | 7.126949 | 2               | 4.593021393 |
| <b>F1MYX5</b>     | Lymphocyte cytosolic protein 1             | 70.068   | 3.668262 | 2               | 2.719077349 |
| <b>A6QNW3</b>     | PIGR protein                               | 82.455   | 3.698811 | 2               | 5.614470482 |
| <b>Q5XQN5</b>     | Keratin, type II cytoskeletal 5            | 62.898   | 9.151414 | 2               | 28.92585468 |
| <b>P79334</b>     | Glycogen phosphorylase                     | 97.232   | 1.781473 | 2               | 5.125619888 |
| <b>Q3MHN2</b>     | Complement component C9                    | 61.958   | 4.19708  | 2               | 4.258058071 |

\*Classification given by author.
