# Supplementary material for: Extracellular vesicles in infectious diseases caused by protozoan parasites in buffaloes
Source: PubMed Central journal article supplement (PMC7262785; doi:10.1590/1678-9199-jvatitd-2019-0067), 2020-05-29
Supplement: 1678-9199-jvatitd-26-e20190067-s2.pdf [file 1678-9199-jvatitd-26-e20190067-s2.pdf]

## Supplementary Material to “Extracellular vesicles in infectious diseases caused by protozoan parasites in buffaloes”

**Additional file 2.** Summary of extracellular vesicle proteins of *Theileria* spp. isolated from serum of control animals present in Fraction F3.

| Code access       | Description*                                      | MW [kDa] | Coverage | Unique Peptides | Score         |
|-------------------|---------------------------------------------------|----------|----------|-----------------|---------------|
| <b>E1BNR0</b>     | Apolipoprotein                                    | 515.438  | 23.40705 | 94              | 495.0726119   |
| <b>Q2UVX4</b>     | Complement C3                                     | 187.135  | 31.66767 | 52              | 345.5245875   |
| <b>A0A0F6QNP7</b> | Complement component 3                            | 187.064  | 31.24623 | 51              | 343.8403611   |
| <b>G3X7A5</b>     | Complement C3                                     | 187.028  | 30.70439 | 51              | 330.6581188   |
| <b>B8Y9S9</b>     | Fibronectin 1                                     | 262.263  | 15.37494 | 24              | 110.1794619   |
| <b>G5E5A9</b>     | Fibronectin                                       | 271.952  | 14.81033 | 24              | 110.1794619   |
| <b>P07589</b>     | Fibronectin                                       | 271.983  | 14.81033 | 24              | 110.1794619   |
| <b>B8Y9T0</b>     | Fibronectin 1                                     | 248.974  | 16.18165 | 24              | 110.1794619   |
| <b>P15497</b>     | Apolipoprotein A-I                                | 30.258   | 47.16981 | 15              | 117.2911120   |
| <b>Q0VCM4</b>     | Glycogen phosphorylase                            | 97.394   | 1.527614 | 1               | 0             |
| <b>F1MI18</b>     | Uncharacterized protein                           | 165.654  | 19.68876 | 26              | 176.92844569  |
| <b>F1MJK3</b>     | Uncharacterized protein                           | 165.506  | 19.66216 | 26              | 176.9284456   |
| <b>A0A140T897</b> | Serum albumin                                     | 69.278   | 28.33607 | 16              | 87.0102145    |
| <b>P02769</b>     | Serum albumin                                     | 69.248   | 28.33607 | 16              | 87.0102145    |
| <b>P23805</b>     | Conglutinin                                       | 37.971   | 26.68463 | 14              | 380.1768126   |
| <b>P80457</b>     | Xanthine dehydrogenase/oxidase                    | 146.696  | 0.750750 | 1               | 2.965109582   |
| <b>F1MUT3</b>     | Xanthine dehydrogenase/oxidase                    | 146.669  | 0.750750 | 16              | 2.965109586   |
| <b>B0JYQ0</b>     | ALB protein                                       | 69.248   | 26.19439 | 15              | 80.409170196  |
| <b>F1MVP0</b>     | ADAM metalloproteinase with thrombospondin type 1 | 151.374  | 19.67213 | 15              | 120.12379646  |
| <b>F1N0R5</b>     | von Willebrand factor                             | 307.475  | 3.596866 | 8               | 26.1033883094 |
| <b>F1MAV0</b>     | Fibrinogen beta chain                             | 56.405   | 20.40404 | 8               | 51.431623342  |
| <b>E1BH06</b>     | Uncharacterized protein                           | 192.644  | 15.62320 | 10              | 86.6288429    |
| <b>F5XVA9</b>     | von Willebrand factor                             | 307.745  | 3.594306 | 8               | 26.10338830   |

| Code access       | Description*                                           | MW [kDa] | Coverage  | Unique Peptides | Score        |
|-------------------|--------------------------------------------------------|----------|-----------|-----------------|--------------|
| <b>P02676</b>     | Fibrinogen beta chain                                  | 53.306   | 20.08547  | 7               | 25.59032678  |
| <b>F1MY85</b>     | Complement C5a anaphylatoxin                           | 188.927  | 2.444841  | 4               | 8.5798010826 |
| <b>V6F869</b>     | Apolipoprotein A-I-like                                | 23.629   | 29.80769  | 7               | 44.303140    |
| <b>A0A0F6QMJ3</b> | Complement component 5                                 | 188.691  | 2.444841  | 4               | 8.5798010    |
| <b>F1N3Q7</b>     | Apolipoprotein A-IV                                    | 42.963   | 30.52631  | 13              | 71.981267    |
| <b>Q32PJ2</b>     | Apolipoprotein A-IV                                    | 42.991   | 30.52631  | 13              | 71.981267    |
| <b>G3N0I4</b>     | Cytosol aminopeptidas                                  | 54.047   | 1.606425  | 1               | 1.9673806    |
| <b>P00727</b>     | Cytosol aminopeptidas                                  | 56.254   | 1.967380  | 1               | 1.9673802    |
| <b>Q693V9</b>     | Complement component 3d                                | 34.422   | 21.45214  | 1               | 87.169953    |
| <b>Q3MHL4</b>     | Adenosylhomocysteinase 3                               | 47.607   | 21.40992  | 7               | 137.36276    |
| <b>P00432</b>     | Catalase                                               | 59.878   | 2.466793  | 1               | 0            |
| <b>Q7SIH1</b>     | Alpha-2-macroglobulin                                  | 167.47   | 31.32450  | 10              | 668.51652    |
| <b>Q95KV5</b>     | Fibronectin                                            | 38.32    | 38.04034  | 9               | 46.092858    |
| <b>F1MQ37</b>     | Myosin heavy chain 9                                   | 226.962  | 19.67213  | 13              | 134.312602   |
| <b>F1MD73</b>     | Uncharacterized protein                                | 189.978  | 12.50713  | 10              | 35.2686412   |
| <b>A5PJE3</b>     | Fibrinogen alpha chain                                 | 66.957   | 10.08130  | 6               | 18.8123501   |
| <b>P02672</b>     | Fibrinogen alpha chain                                 | 66.971   | 10.08130  | 6               | 18.8123501   |
| <b>A5D9E9</b>     | Complement C1r subcomponent precursor                  | 80.161   | 5.673758  | 1               | 6.06269646   |
| <b>Q03247</b>     | Apolipoprotein                                         | 35.958   | 21.51898  | 6               | 50.4440462   |
| <b>Q2TBU0</b>     | Haptoglobin                                            | 44.831   | 23.19201  | 8               | 48.0335323   |
| <b>E1BI98</b>     | Collagen type VI alpha 1 chain                         | 108.603  | 21.867321 | 6               | 124.459278   |
| <b>G5E513</b>     | Uncharacterized protein                                | 49.939   | 20        | 6               | 22.3382167   |
| <b>A6QPX7</b>     | FGB protein (Fragment)                                 | 37.907   | 9.456521  | 5               | 35.100500    |
| <b>P01030</b>     | Complement C4                                          | 101.817  | 17.06522  | 9               | 43.73454607  |
| <b>E1B805</b>     | Uncharacterized protein                                | 187.149  | 23.192019 | 8               | 48.0335323   |
| <b>G3X6K8</b>     | Haptoglobin                                            | 44.845   | 25.69327  | 8               | 34.74552003  |
| <b>A0A140T881</b> | Apolipoprotein                                         | 36.017   | 21.518987 | 9               | 50.4440462   |
| <b>G3N3D4</b>     | Potassium channel tetramerization domain containing 12 | 35.701   | 8.5427135 | 3               | 41.012642    |
| <b>A7YWR0</b>     | Apolipoprotein                                         | 36.051   | 21.51898  | 3               | 21.51898     |
| <b>E1BFN6</b>     | Dihydropyrimidinase                                    | 56.267   | 4.207119  | 5               | 4.20711974   |
| <b>P81187</b>     | Complement factor B                                    | 85.312   | 1.7241379 | 1               | 4.834334     |
| <b>P17697</b>     | Clusterin                                              | 51.081   | 9.1116173 | 3               | 10.1167018   |
| <b>F1N076</b>     | Ceruloplasmin                                          | 123.731  | 4.792626  | 4               | 12.1857370   |

| Code access   | Description*                             | MW [kDa] | Coverage   | Unique Peptides | Score       |
|---------------|------------------------------------------|----------|------------|-----------------|-------------|
| <b>R9QSM8</b> | Alpha-2-macroglobulin                    | 133.302  | 32.637729  | 10              | 531.153768  |
| <b>F1N514</b> | CD5 antigen-like precursor               | 50.305   | 20.75055   | 7               | 16.0244067  |
| <b>Q3SZZ9</b> | FGG protein                              | 49.136   | 18.16091   | 8               | 38.8492791  |
| <b>Q0VCX1</b> | Complement C1s subcomponent              | 76.56    | 6.386066   | 12              | 12.067846   |
| <b>F1MJ12</b> | Complement C1s subcomponent              | 77.332   | 6.330935   | 12              | 23.25133181 |
| <b>F1MGU7</b> | Fibrinogen gamma-B chain                 | 50.2     | 17.83295   | 8               | 38.8492790  |
| <b>Q95KV4</b> | Fibronectin (Fragment)                   | 35.464   | 5.184630   | 4               | 5.97265890  |
| <b>Q3Y5Z3</b> | Adiponectin                              | 26.117   | 20.74950   | 8               | 29.8565749  |
| <b>Q0ZCB4</b> | Apolipoprotein                           | 27.057   | 7.9755563  | 3               | 0.98859376  |
| <b>A2VDY5</b> | Hydroxysteroid (17-beta)                 | 28.378   | 8.1481481  | 2               | 4.8307673   |
| <b>Q9MYP6</b> | 17-beta-hydroxysteroid dehydrogenas      | 28.404   | 24.27707   | 3               | 9.39274930  |
| <b>A6QNW7</b> | CD5L protein                             | 50.179   | 16.837208  | 4               | 8.77830857  |
| <b>Q0P5J7</b> | Keratin. type I cuticular Ha5            | 49.905   | 1.538461   | 2               | 2.12892317  |
| <b>B7FEK7</b> | 43kDa collectin                          | 33.594   | 8.411214   | 4               | 129.4997527 |
| <b>E1BPW6</b> | Keratin. type I cuticular Ha5            | 49.739   | 1.54867    | 2               | 2.12892317  |
| <b>Q28178</b> | Thrombospondin-1                         | 129.451  | 10.2564102 | 11              | 66.87595036 |
| <b>A7E3W2</b> | Galectin-3-binding protein               | 62.087   | 8.6486486  | 5               | 26.75749302 |
| <b>F1MKG2</b> | Collagen type VI alpha 2 chain           | 109.253  | 2.0447994  | 2               | 5.74746538  |
| <b>B8Y898</b> | Malic enzyme                             | 63.853   | 12.8640776 | 3               | 28.8594936  |
| <b>P02663</b> | Alpha-S2-casein                          | 26.002   | 8.5585585  | 2               | 6.87464993  |
| <b>F1MC11</b> | Keratin. type I cytoskeletal 14          | 51.879   | 15.72327   | 6               | 28.12601042 |
| <b>A6QNZ7</b> | Keratin 10                               | 54.816   | 8.55513    | 4               | 31.8585664  |
| <b>P12799</b> | Fibrinogen gamma-B chain                 | 50.212   | 1.441441   | 7               | 34.8575392  |
| <b>Q3SYR8</b> | Immunoglobulin J chain                   | 17.846   | 22.92993   | 6               | 69.2885639  |
| <b>F1N3A1</b> | Thrombospondin-1                         | 129.309  | 11.282051  | 1               | 68.986869   |
| <b>A7E3D5</b> | Proteasome subunit alpha type (Fragment) | 26.551   | 4.6413502  | 1               | 1.7184752   |
| <b>K4JR81</b> | Alpha-2-macroglobulin variant 12         | 61.673   | 21.723518  | 11              | 186.688745  |
| <b>Q3ZBG0</b> | Proteasome subunit alpha type-7          | 27.852   | 4.4354838  | 1               | 1.88745493  |
| <b>F1MSZ6</b> | Antithrombin-III OS=Bos taurus           | 52.407   | 10.96774   | 4               | 15.8486339  |
| <b>P00735</b> | Prothrombin                              | 70.461   | 3.27510    | 1               | 7.94946922  |
| <b>F1MFY6</b> | Collectin-43 precursor                   | 24.905   | 11.02040   | 4               | 129.993746  |
| <b>Q58D62</b> | Fetuin-B                                 | 42.636   | 8.485856   | 3               | 41.0936353  |
| <b>P06394</b> | Keratin. type I cytoskeletal 10          | 54.815   | 8.555133   | 4               | 31.9936534  |

| Code access       | Description*                            | MW [kDa] | Coverage   | Unique Peptides | Score        |
|-------------------|-----------------------------------------|----------|------------|-----------------|--------------|
| <b>Q3SZJ0</b>     | Argininosuccinate lyase                 | 52.71    | 10.847453  | 8               | 120.948452   |
| <b>G5E5C3</b>     | Proteasome subunit alpha type           | 27.267   | 10         | 4               | 7.99463420   |
| <b>F1MM86</b>     | Complement component C6                 | 104.455  | 5.955242   | 3               | 0.99374294   |
| <b>G3N0V2</b>     | Keratin 1                               | 63.113   | 9.075907   | 5               | 43.8835422   |
| <b>O02808</b>     | Von Willebrand factor (Fragment)        | 59.57    | 12.99825   | 5               | 130.999273   |
| <b>Q3SYT3</b>     | Complement C1r subcomponent precursor   | 44.528   | 12.992654  | 4               | 15.88864435  |
| <b>Q2YDE4</b>     | Proteasome subunit alpha type-6         | 27.382   | 20.993752  | 3               | 12.89826425  |
| <b>F1MTV7</b>     | Argininosuccinate lyase                 | 52.682   | 2.1515015  | 4               | 238.998765   |
| <b>B8YB77</b>     | Malic enzyme                            | 63.332   | 5.9972543  | 5               | 10.993764    |
| <b>G3X6N3</b>     | Serotransferrin                         | 77.616   | 7.9864311  | 5               | 9.9864321    |
| <b>E1BFG1</b>     | Uncharacterized protein                 | 50.005   | 15.23342   | 2               | 2.12892319   |
| <b>F1MRZ6</b>     | Tenascin C                              | 244.461  | 4.9987354  | 3               | 0.987354335  |
| <b>G5E5T5</b>     | Uncharacterized protein                 | 42.442   | 4.997353   | 1               | 0.09375343   |
| <b>Q3SYR5</b>     | Apolipoprotein C-IV                     | 14.428   | 8.0937635  | 1               | 0.98365343   |
| <b>Q29RU4</b>     | Complement component C6                 | 104.473  | 12.0937354 | 5               | 129.098765   |
| <b>Q3T063</b>     | Nicotinate-nucleotide pyrophosphorylase | 31.131   | 3.983754   | 4               | 6.09487465   |
| <b>E1BL29</b>     | Bleomycin hydrolase                     | 52.896   | 9.98476453 | 4               | 308.948743   |
| <b>Q29443</b>     | Serotransferrin                         | 77.703   | 6.9876543  | 5               | 21.947465443 |
| <b>F1MHB8</b>     | Nicotinate-nucleotide pyrophosphorylase | 31.165   | 10.0948476 | 1               | 0.98765438   |
| <b>P41361</b>     | Antithrombin-III                        | 52.314   | 12.094765  | 3               | 11.0946544   |
| <b>Q71U44</b>     | Fibronectin (Fragment)                  | 45.802   | 15.96117   | 4               | 16.0987654   |
| <b>A0JN60</b>     | Tenascin C                              | 190.961  | 3.180985   | 2               | 1.98476544   |
| <b>E1BH94</b>     | Peptidoglycan recognition protein 2     | 59.793   | 12.0958765 | 3               | 11.5987654   |
| <b>F1MRZ5</b>     | Tenascin C                              | 191.032  | 3.0958765  | 1               | 7.59876543   |
| <b>Q2KIV9</b>     | Complement C1q subcomponent subunit B   | 26.383   | 7.0948765  | 1               | 7.09586532   |
| <b>Q28194</b>     | Thrombospondin-1                        | 25       | 1.98576543 | 2               | 5.09765432   |
| <b>Q9TUQ0</b>     | Anion exchange protein                  | 95.582   | 3.987654   | 3               | 11.87643221  |
| <b>Q148H5</b>     | Keratin. type II cytoskeletal           | 57.372   | 1.714285   | 1               | 16.02440679  |
| <b>Q32KL2</b>     | Proteasome subunit beta type-5          | 28.591   | 15.887654  | 2               | 5.875421187  |
| <b>P63258</b>     | Actin. cytoplasmic 2                    | 41.766   | 10.987653  | 3               | 9.876543215  |
| <b>B5B3R8</b>     | Alpha S1 casein                         | 24.427   | 9.9876543  | 3               | 13.87654321  |
| <b>A0A1B0Z542</b> | Heat shock 27 kDa protein 1             | 22.231   | 12.987654  | 1               | 0.09876543   |
| <b>Q9XSW5</b>     | Anion exchange protein                  | 104.308  | 2.8765432  | 4               | 15.87643221  |

| Code access       | Description*                                   | MW [kDa] | Coverage   | Unique Peptides | Score        |
|-------------------|------------------------------------------------|----------|------------|-----------------|--------------|
| <b>F1MNW4</b>     | Inter-alpha-trypsin inhibitor heavy chain H2   | 106.09   | 4.75687103 | 3               | 6.98654432   |
| <b>Q3MHF7</b>     | S-methyl-5'-thioadenosine phosphorylase        | 31.236   | 19.986432  | 3               | 7.9876543    |
| <b>F1N3V0</b>     | Malic enzyme                                   | 63.746   | 11.986432  | 3               | 12.8765432   |
| <b>F1MYN5</b>     | Fibulin-1                                      | 77.434   | 8.087654   | 3               | 8.98765454   |
| <b>A5D7S8</b>     | Fibulin-1                                      | 77.478   | 2.987654   | 2               | 3.9876544    |
| <b>A0A1C9EIX3</b> | Heat shock protein family B member 1 variant 1 | 22.351   | 3.0987654  | 2               | 8.98765438   |
| <b>Q58DP7</b>     | Heat shock 27kDa protein 1                     | 17.545   | 10.987654  | 3               | 9.98765434   |
| <b>E9RHW1</b>     | Heat shock 27kDa protein 1                     | 22.379   | 9.9876543  | 2               | 7.9876543    |
| <b>Q3T0X5</b>     | Proteasome subunit alpha type-1                | 29.567   | 43.28358   | 4               | 238.9876543  |
| <b>P02662</b>     | Alpha-S1-casein                                | 24.513   | 11.682242  | 2               | 4.09876548   |
| <b>P60712</b>     | Actin. cytoplasmic 1                           | 41.71    | 7.7333333  | 2               | 7.9876924    |
| <b>P31976</b>     | Ezrin                                          | 68.717   | 6.9876543  | 2               | 4.0898243    |
| <b>Q3ZCK9</b>     | Proteasome subunit alpha type-4                | 29.465   | 19.9876543 | 4               | 27.9289973   |
| <b>Q9TUQ1</b>     | Anion exchange protein                         | 74.3     | 5.987654   | 4               | 9.763430     |
| <b>A0A1C9EIX6</b> | Heat shock protein family B member 1 variant 2 | 22.389   | 19.998533  | 3               | 5.9876543    |
| <b>A5D984</b>     | Pyruvate kinase                                | 57.912   | 10.998745  | 3               | 120.87654    |
| <b>Q28085</b>     | Complement factor H                            | 140.282  | 4.9988543  | 3               | 3.87654365   |
| <b>F1MC45</b>     | Complement factor H precursor                  | 96.53    | 9.993425   | 3               | 10.987654    |
| <b>F1MRD0</b>     | Actin. cytoplasmic 1                           | 41.825   | 10.096543  | 2               | 13.9937432   |
| <b>Q9BGI2</b>     | Peroxiredoxin-4                                | 30.722   | 18.1983738 | 4               | 120.09376354 |
| <b>Q3ZC87</b>     | Pyruvate kinase (Fragment)                     | 61.389   | 1.0987654  | 2               | 0.987650876  |
| <b>E1BEL7</b>     | Heat shock protein beta-1                      | 22.564   | 2.021975   | 2               | 8.093763543  |
| <b>Q7M2T6</b>     | Band 3 anion transport protein (Fragments)     | 34.3     | 10.983753  | 4               | 186.09837365 |
| <b>A5D7R6</b>     | ITIH2 protein                                  | 106.12   | 2.0987643  | 2               | 1.987354332  |
| <b>G3X7S2</b>     | Heat shock protein beta-1                      | 17.432   | 4.0876524  | 3               | 4.08754221   |
| <b>Q1JQB0</b>     | Collagen type VI alpha 2 chain                 | 97.075   | 2.0976543  | 1               | 0.98765432   |
| <b>Q6T182</b>     | Sex hormone-binding globulin (Fragment)        | 40.069   | 10.087654  | 2               | 7.0987643    |
| <b>Q29RQ1</b>     | Complement component C7                        | 93.029   | 2.9876543  | 3               | 12.9876543   |
| <b>G5E5H7</b>     | Uncharacterized protein                        | 19.898   | 23.987654  | 1               | 4.9876543    |
| <b>K4JF16</b>     | Alpha-2-macroglobulin variant 23               | 101.296  | 5.09871457 | 1               | 19.8632145   |
| <b>Q2HJ86</b>     | Tubulin alpha-1D chain                         | 50.251   | 19.9876543 | 1               | 3.986439876  |
| <b>P81947</b>     | Tubulin alpha-1B chain                         | 50.12    | 3.9876543  | 1               | 8.09876543   |
| <b>A3KLR9</b>     | Superoxide dismutase [Cu-Zn]                   | 26.16    | 12.9876543 | 1               | 10.87654987  |

| Code access       | Description*                                 | MW [kDa] | Coverage   | Unique Peptides | Score       |
|-------------------|----------------------------------------------|----------|------------|-----------------|-------------|
| <b>E1BFN5</b>     | Uncharacterized protein                      | 78.333   | 10.0987654 | 2               | 5.0882533   |
| <b>Q1RML9</b>     | Platelet-activating factor acetylhydrolas    | 50.119   | 12.0937343 | 1               | 0.98764322  |
| <b>Q05B55</b>     | IGK protein                                  | 26.574   | 10.0987654 | 1               | 11.0987654  |
| <b>Q32KN8</b>     | Tubulin alpha-3 chain                        | 49.894   | 9.0987654  | 2               | 6.0947542   |
| <b>Q6KDN5</b>     | Complement component 3 (Fragment)            | 7.414    | 47.094876  | 2               | 0.09464367  |
| <b>F1MNV5</b>     | Kininogen-1                                  | 48.391   | 5.984454   | 3               | 28.09476543 |
| <b>Q17QL7</b>     | KRT15 protein                                | 48.969   | 12.0987654 | 3               | 110.1794619 |
| <b>K4JR88</b>     | Alpha-2-macroglobulin variant 22             | 77.345   | 4.0984326  | 1               | 6.2589853   |
| <b>B5B0D4</b>     | Major allergen beta-lactoglobulin            | 19.956   | 2.986421   | 2               | 0.986422467 |
| <b>F1MH40</b>     | Uncharacterized protein                      | 26.318   | 2.76542345 | 1               | 1.09876411  |
| <b>K4JDR8</b>     | Alpha-2-macroglobulin variant 5              | 45.046   | 5.8765431  | 1               | 0.63212345  |
| <b>A1L595</b>     | Keratin. type I cytoskeletal 17              | 48.682   | 7.7654234  | 1               | 0.95327888  |
| <b>A0A140T8C8</b> | Kininogen-1                                  | 68.922   | 5.9876543  | 1               | 3.9876543   |
| <b>P01044</b>     | Kininogen-1                                  | 68.847   | 5.09876    | 1               | 0.14987654  |
| <b>G3X6I0</b>     | Uncharacterized protein                      | 202.852  | 1.9876543  | 1               | 0.260093635 |
| <b>F1N045</b>     | Complement component C7                      | 92.929   | 0.677343   | 2               | 12.8753321  |
| <b>Q2HJ49</b>     | Moesin                                       | 67.933   | 8.0846354  | 1               | 7.05987364  |
| <b>F2Z4C1</b>     | Tubulin alpha chain                          | 50.104   | 7.09483765 | 1               | 6.50948736  |
| <b>P81644</b>     | Apolipoprotein A-II                          | 11.195   | 2          | 1               | 0.16497433  |
| <b>A0A140T867</b> | Keratin. type I cytoskeletal 17              | 48.712   | 3.594306   | 1               | 6.0924317   |
| <b>Q32LP2</b>     | Radixin                                      | 68.525   | 1.059876   | 1               | 2.0598473   |
| <b>F1MMP5</b>     | Inter-alpha-trypsin inhibitor heavy chain H1 | 101.174  | 3.098541   | 1               | 2.93753365  |
| <b>A5PKC2</b>     | SHBG protein                                 | 43.288   | 11.0847354 | 2               | 31.0475233  |
| <b>P56652</b>     | Inter-alpha-trypsin inhibitor heavy chain H3 | 99.489   | 1.0847354  | 2               | 5.05948736  |
| <b>F6RP72</b>     | Tubulin alpha chain                          | 49.797   | 2.054654   | 1               | 2.059847365 |
| <b>Q28017</b>     | Platelet-activating factor acetylhydrolas    | 50.101   | 3.0948376  | 1               | 0.0594873   |
| <b>O46415</b>     | Ferritin light chain                         | 19.975   | 32.059487  | 0               | 0.0598476   |
| <b>M0QVY0</b>     | Uncharacterized protein                      | 60.767   | 2.0984634  | 1               | 0.02862225  |
| <b>E1BD83</b>     | Proteasome subunit alpha type                | 29.184   | 15.038634  | 1               | 11.34855783 |
| <b>O02717</b>     | Non-muscle myosin heavy chain (Fragment)     | 72.327   | 6.0947432  | 1               | 7.98362433  |
| <b>Q27991</b>     | Myosin-10                                    | 228.958  | 0.0598476  | 1               | 4.958735433 |
| <b>P01966</b>     | Hemoglobin subunit alpha                     | 15.175   | 3.5167384  | 1               | 8.0594764   |
| <b>G5E604</b>     | Uncharacterized protein                      | 11.051   | 7.04752456 | 1               | 69.0584635  |

| Code access   | Description*                                 | MW [kDa] | Coverage    | Unique Peptides | Score       |
|---------------|----------------------------------------------|----------|-------------|-----------------|-------------|
| <b>P02754</b> | Beta-lactoglobulin                           | 19.87    | 5.4         | 1               | 0.0918625   |
| <b>K4JBA2</b> | Alpha-2-macroglobulin variant 9              | 43.75    | 16.59574468 | 1               | 134.4589926 |
| <b>A4FV94</b> | KRT6A protein                                | 60.783   | 2.272727273 | 1               | 2.706366062 |
| <b>B0JYP6</b> | IGK protein                                  | 26.304   | 4.166666667 | 1               | 14.54332852 |
| <b>K4JBR5</b> | Alpha-2-macroglobulin variant 1              | 115.118  | 2.00729927  | 2               | 1.662858129 |
| <b>Q0VCM5</b> | Inter-alpha-trypsin inhibitor heavy chain H1 | 101.173  | 20          | 1               | 4.905816555 |
| <b>P01045</b> | Kininogen-2                                  | 68.666   | 12.93103448 | 1               | 17.31717205 |
| <b>Q2TBX6</b> | Proteasome subunit beta type-1               | 26.229   | 2.466793169 | 1               | 0           |
| <b>Q05443</b> | Lumican                                      | 38.732   | 17.09401709 | 1               | 138.1611656 |
| <b>G3N0S9</b> | Uncharacterized protein                      | 22.321   | 1.642335766 | 1               | 2.366074562 |
| <b>P34955</b> | Alpha-1-antiproteinase                       | 46.075   | 3.284671533 | 1               | 2.431547165 |
| <b>P19035</b> | Apolipoprotein C-III                         | 10.685   | 1.527614571 | 1               | 0           |
| <b>F1MZ96</b> | Uncharacterized protein                      | 26.545   | 1.62601626  | 1               | 4.03635323  |
| <b>P33672</b> | Proteasome subunit beta type-3               | 22.977   | 4.530744337 | 1               | 7.071590424 |
| <b>E1BB91</b> | Collagen type VI alpha 3 chain               | 342.197  | 1.724137931 | 1               | 4.834334612 |
| <b>F2Z4K0</b> | Tubulin alpha chain                          | 49.928   | 3.643724696 | 1               | 1.762604713 |
| <b>P63103</b> | 14-3-3 protein zeta/delta                    | 27.728   | 8.196721311 | 1               | 3.0535779   |
| <b>F1MJJ8</b> | Radixin                                      | 68.541   | 3.542234332 | 1               | 2.346296549 |
| <b>G5E589</b> | Proteasome subunit beta type                 | 26.301   | 4.013377926 | 1               | 3.323835135 |
| <b>Q3ZCJ7</b> | Tubulin alpha-1C chain                       | 49.825   | 1.408450704 | 1               | 2.039117575 |
| <b>Q32LE5</b> | Isoaspartyl peptidase/L-asparaginase         | 32.03    | 4.013377926 | 1               | 3.323835135 |
| <b>K4JDS3</b> | Alpha-2-macroglobulin variant 10             | 52.304   | 1.269035533 | 1               | 2.039117575 |
| <b>Q687I9</b> | Purine nucleoside phosphorylase              | 32.046   | 4.191616766 | 1               | 2.190802097 |
| <b>F1MVJ8</b> | Olfactomedin 4                               | 57.76    | 4.191616766 | 1               | 2.190802097 |
| <b>F1MJH1</b> | Gelsolin                                     | 80.653   | 3.539823009 | 1               | 0           |
| <b>G3X8C8</b> | Uncharacterized protein                      | 25.166   | 3.921568627 | 1               | 0           |
| <b>P62739</b> | Actin, aortic smooth muscle                  | 41.982   | 0.750750751 | 1               | 2.965109587 |
| <b>Q28921</b> | Alpha 1-antichymotrypsin (Fragment)          | 28.553   | 0.094746435 | 1               | 3.094763543 |
| <b>Q28007</b> | Dihydropyrimidine dehydrogenase [NADP(+)]    | 111.625  | 18.8034188  | 1               | 14.98669171 |
| <b>Q3SX14</b> | Gelsolin                                     | 80.681   | 15.17241379 | 1               | 14.98669171 |
| <b>Q9XTA3</b> | Myocilin                                     | 54.853   | 6.986899563 | 1               | 4.565480947 |
| <b>A2I7M9</b> | Serpin A3-2                                  | 46.208   | 9.142857143 | 1               | 4.565480947 |
| <b>B0JYK6</b> | Alpha-1.4 glucan phosphorylase               | 97.227   | 5.97826087  | 1               | 2.060161829 |

| Code access       | Description*                                                                   | MW [kDa] | Coverage    | Unique Peptides | Score       |
|-------------------|--------------------------------------------------------------------------------|----------|-------------|-----------------|-------------|
| <b>Q1JPD0</b>     | Complement component 8. alpha polypeptide                                      | 32.621   | 5.97826087  | 1               | 2.060161829 |
| <b>P80012</b>     | von Willebrand factor (Fragment)                                               | 102.531  | 3.375527426 | 1               | 1.675248504 |
| <b>Q862P9</b>     | Similar to beta actin (Fragment)                                               | 20.968   | 4.854368932 | 1               | 16.78249788 |
| <b>F1MKC4</b>     | Actin. gamma-enteric smooth muscle                                             | 41.898   | 4.862236629 | 1               | 16.78249788 |
| <b>Q2KIH5</b>     | Complement component 8. alpha polypeptide                                      | 66.292   | 2.330508475 | 1               | 1.985862494 |
| <b>G3MXU3</b>     | Collagen type VI alpha 2 chain                                                 | 24.991   | 2.330508475 | 1               | 1.985862494 |
| <b>G3N126</b>     | Collagen type VI alpha 3 chain                                                 | 134.797  | 31.25       | 1               | 0           |
| <b>A0A140T871</b> | Glutamate dehydrogenase 1. mitochondrial                                       | 61.592   | 6.530612245 | 1               | 0           |
| <b>Q58DU5</b>     | Proteasome subunit alpha type-3                                                | 28.387   | 3.703703704 | 1               | 1.745364189 |
| <b>F1MJ28</b>     | Alpha-1.4 glucan phosphorylase                                                 | 97.218   | 3.703703704 | 1               | 1.745364189 |
| <b>Q3T186</b>     | Ribose-5-phosphate isomerase                                                   | 28.735   | 0.948991696 | 1               | 1.911735296 |
| <b>Q8SPJ1</b>     | Junction plakoglobin                                                           | 81.769   | 0.948991696 | 1               | 1.911735296 |
| <b>A6QQC9</b>     | OLFM4 protein (Fragment)                                                       | 49.706   | 1.146788991 | 1               | 0           |
| <b>Q28908</b>     | Mucin (Fragment)                                                               | 54.83    | 1.606425703 | 1               | 1.967380643 |
| <b>F1MX87</b>     | Complement C8 alpha chain                                                      | 66.234   | 1.541425819 | 1               | 1.967380643 |
| <b>H9KUV2</b>     | S-methyl-5'-thioadenosine phosphorylase                                        | 32.883   | 4.435483871 | 1               | 1.710465074 |
| <b>G3N1U4</b>     | Serpin A3-3                                                                    | 46.127   | 40          | 1               | 1.683246493 |
| <b>F1MNF8</b>     | Tubulin alpha chain                                                            | 49.87    | 4.641350211 | 1               | 1.710465074 |
| <b>A3FJ56</b>     | Kappa casein (Fragment)                                                        | 17.836   | 7.185628743 | 1               | 1.683246493 |
| <b>Q705V4</b>     | Kappa-casein (Fragment)                                                        | 17.693   | 8.108108108 | 1               | 1.683246493 |
| <b>Q0VCX2</b>     | Endoplasmic reticulum chaperone BiP                                            | 72.356   | 4.214559387 | 1               | 1.710465074 |
| <b>A5D7L1</b>     | C-type lectin domain containing 11A                                            | 35.593   | 7.441860465 | 1               | 11.34865713 |
| <b>Q3T052</b>     | Inter-alpha-trypsin inhibitor heavy chain H4                                   | 101.449  | 7.441860465 | 1               | 11.34865713 |
| <b>F1N549</b>     | Dihydropyrimidine dehydrogenas                                                 | 111.766  | 4.366812227 | 1               | 2.962756634 |
| <b>G5E534</b>     | Ribose-5-phosphate isomerase                                                   | 32.82    | 39.36781609 | 1               | 177.1562679 |
| <b>Q3ZC07</b>     | Actin. alpha cardiac muscle                                                    | 41.992   | 7.00525394  | 1               | 35.08573425 |
| <b>Q2KJF1</b>     | Alpha-1B-glycoprotein                                                          | 53.52    | 7.00525394  | 1               | 35.08573425 |
| <b>Q5EA67</b>     | Inter-alpha (Globulin) inhibitor H4 (Plasma Kallikrein-sensitive glycoprotein) | 101.446  | 22.5        | 1               | 2.310394764 |
| <b>Q3B7M9</b>     | Glycogen phosphorylase                                                         | 96.279   | 1.181102362 | 1               | 2.475919485 |
| <b>F1N1I6</b>     | Gelsolin                                                                       | 85.634   | 10.5        | 1               | 2.576021194 |
| <b>O46375</b>     | Transthyretin                                                                  | 15.717   | 15.10791367 | 1               | 28.31982374 |
| <b>F1N0I3</b>     | Coagulation factor V                                                           | 222.078  | 32.69012486 | 1               | 412.5393873 |



| Code access       | Description*                                      | MW [kDa] | Coverage    | Unique Peptides | Score       |
|-------------------|---------------------------------------------------|----------|-------------|-----------------|-------------|
| <b>P02081</b>     | Hemoglobin fetal subunit beta                     | 15.849   | 3.140096618 | 1               | 2.346296549 |
| <b>P02668</b>     | Kappa-casein                                      | 21.256   | 3.140096618 | 1               | 2.346296549 |
| <b>B8YB76</b>     | Homogentisat                                      | 49.965   | 1.449275362 | 1               | 1.972269893 |
| <b>Q9TTE1</b>     | Serpin A3-1                                       | 46.208   | 2.064220183 | 1               | 1.972269893 |
| <b>P81948</b>     | Tubulin alpha-4A chain                            | 49.892   | 4.010025063 | 1               | 4.602294922 |
| <b>Q3SX06</b>     | Myocilin                                          | 54.854   | 3.925233645 | 1               | 21.29518712 |
| <b>F1MU24</b>     | Alpha-1.4 glucan phosphorylase                    | 76.125   | 5.594405594 | 1               | 2.830938339 |
| <b>P68138</b>     | Actin. alpha skeletal muscle                      | 42.024   | 4.929577465 | 1               | 1.777470112 |
| <b>F1MXQ3</b>     | FAM20C. golgi associated secretory pathway kinase | 61.848   | 4.506437768 | 1               | 24.21742165 |
| <b>A8YXZ2</b>     | C8G protein                                       | 25.272   | 1.923076923 | 1               | 1.738595843 |
| <b>A2I7N1</b>     | Serpin A3-5                                       | 46.368   | 5.66893424  | 1               | 19.4173373  |
| <b>Q3ZBS7</b>     | Vitronectin                                       | 53.541   | 5.66893424  | 1               | 19.4173373  |
| <b>D4QBB4</b>     | Globin A1                                         | 15.944   | 5.353319058 | 1               | 19.4173373  |
| <b>A5D7Q2</b>     | Uncharacterized protein                           | 51.638   | 7.00525394  | 1               | 35.08573425 |
| <b>M0QVZ6</b>     | Keratin. type II cytoskeletal 5                   | 60.629   | 12.76595745 | 1               | 6.226527929 |
| <b>Q2KIH3</b>     | HGD protein (Fragment)                            | 44.278   | 12.4137931  | 1               | 6.226527929 |
| <b>Q5E9B5</b>     | Actin. gamma-enteric smooth muscle                | 41.85    | 12.67605634 | 1               | 6.226527929 |
| <b>Q3ZEJ6</b>     | Serpin A3-3                                       | 46.297   | 13.63636364 | 1               | 6.226527929 |
| <b>Q58DT9</b>     | Alpha 2 actin                                     | 45.192   | 11.25       | 1               | 6.226527929 |
| <b>G3N1Y3</b>     | Uncharacterized protein                           | 12.966   | 9.473684211 | 1               | 6.226527929 |
| <b>G3MX98</b>     | Keratin 9                                         | 54.621   | 12.85714286 | 1               | 6.226527929 |
| <b>Q9MYV8</b>     | Haptoglobin (Fragment)                            | 11.232   | 11.32075472 | 1               | 6.226527929 |
| <b>G3N3E4</b>     | Collagen type VI alpha 3 chain                    | 185.721  | 12.94964029 | 1               | 6.226527929 |
| <b>Q32L76</b>     | Serum amyloid A-4 protein                         | 14.678   | 9.473684211 | 1               | 6.226527929 |
| <b>G8JKX4</b>     | Actin. aortic smooth muscle                       | 45.403   | 13.23529412 | 1               | 6.226527929 |
| <b>A0A0M4FJ17</b> | Kappa-casein (Fragment)                           | 16.015   | 12.94964029 | 1               | 6.226527929 |
| <b>P55859</b>     | Purine nucleoside phosphorylase                   | 32.016   | 1.201602136 | 1               | 2.475919485 |
| <b>F1N614</b>     | 78 kDa glucose-regulated protein precursor        | 66.224   | 2.917771883 | 1               | 5.472857237 |
| <b>A5D7M6</b>     | KRT5 protein                                      | 62.644   | 2.925531915 | 1               | 5.472857237 |
| <b>Q27983</b>     | Alpha1-antichymotrypsin isoform pHHK11 (Fragment) | 22.697   | 1.304347826 | 1               | 2.505360842 |
| <b>A6QPD4</b>     | LOC790886 protein                                 | 45.399   | 1.271186441 | 1               | 2.505360842 |
| <b>F1MMD7</b>     | Inter-alpha-trypsin inhibitor heavy chain H4      | 101.463  | 2.535211268 | 1               | 2.505360842 |
| <b>A4IFM8</b>     | Actin. alpha 1. skeletal muscle                   | 41.996   | 1.271186441 | 1               | 2.505360842 |

| Code access | Description*                               | MW [kDa] | Coverage    | Unique Peptides | Score       |
|-------------|--------------------------------------------|----------|-------------|-----------------|-------------|
| A2I7N0      | Serpin A3-4                                | 46.282   | 5.102040816 | 1               | 0           |
| F1MLF8      | Homogentisat                               | 49.811   | 1.199563795 | 1               | 2.096652985 |
| P81265      | Polymeric immunoglobulin receptor          | 82.383   | 8.064516129 | 1               | 6.581345797 |
| A2I7N2      | Serpin A3-6                                | 46.361   | 0.858369099 | 1               | 0           |
| K4JB97      | Alpha-2-macroglobulin variant 4            | 42.306   | 0.858369099 | 1               | 0           |
| A0A140T8A9  | Kappa-casein                               | 21.224   | 1.453957997 | 1               | 1.972269893 |
| Q28107      | Coagulation factor V                       | 248.828  | 1.449275362 | 1               | 1.972269893 |
| Q0P5J4      | Keratin, type I cytoskeletal 25            | 49.282   | 5.617977528 | 1               | 26.10827029 |
| A5D7J0      | ACTA2 protein                              | 42.01    | 4.929577465 | 1               | 1.777470112 |
| P00366      | Glutamate dehydrogenas                     | 61.473   | 1.717305152 | 1               | 2.41721487  |
| Q3ZC00      | Lymphocyte cytosolic protein 1 (L-plastin) | 70.01    | 2.41187384  | 1               | 2.41721487  |
| Q148H6      | Keratin, type I cytoskeletal 28            | 50.744   | 4.87012987  | 1               | 29.03050482 |
| G8JKW7      | Uncharacterized protein                    | 46.315   | 2.917771883 | 1               | 5.472857237 |
| Q9MZ31      | Fibronectin variable region (Fragment)     | 20.365   | 1.923076923 | 1               | 1.738595843 |
| Q2HJB8      | Tubulin alpha-8 chain                      | 50.022   | 1.19047619  | 1               | 2.475919485 |
| F1MYX5      | Lymphocyte cytosolic protein 1             | 70.068   | 3.867403315 | 1               | 24.21742165 |
| A6QNW3      | PIGR protein                               | 82.455   | 39.408867   | 1               | 187.7336295 |
| Q5XQN5      | Keratin, type II cytoskeletal 5            | 62.898   | 2.709359606 | 1               | 5.472857237 |
| P79334      | Glycogen phosphorylase                     | 97.232   | 2.925531915 | 1               | 5.472857237 |
| Q3MHN2      | Complement component C9                    | 61.958   | 2.917771883 | 1               | 5.472857237 |

\*Classification given by author.
