# Supplementary material for: Extracellular vesicles in infectious diseases caused by protozoan parasites in buffaloes
Source: PubMed Central journal article supplement (PMC7262785; doi:10.1590/1678-9199-jvatitd-2019-0067), 2020-05-29
Supplement: 1678-9199-jvatitd-26-e20190067-s3.pdf [file 1678-9199-jvatitd-26-e20190067-s3.pdf]

## Supplementary Material to “Extracellular vesicles in infectious diseases caused by protozoan parasites in buffaloes”

**Additional file 3.** Summary of extracellular vesicle proteins of *Theileria* spp. isolated from serum of treated animals present in Fraction F3.

| Code access       | Description*                                      | MW [kDa] | Coverage    | Unique peptides | Score       |
|-------------------|---------------------------------------------------|----------|-------------|-----------------|-------------|
| <b>E1BNR0</b>     | Apolipoprotein                                    | 515.438  | 24.12962557 | 103             | 674,8379145 |
| <b>Q2UVX4</b>     | Complement C3                                     | 187.135  | 33.65442505 | 56              | 440,4326642 |
| <b>A0A0F6QNP7</b> | Complement component 3                            | 187.064  | 33.23299217 | 55              | 440,4326642 |
| <b>G3X7A5</b>     | Complement C3                                     | 187.028  | 32.69114991 | 55              | 410,7775776 |
| <b>B8Y9S9</b>     | Fibronectin 1                                     | 262.263  | 27.06325932 | 3               | 327,4399574 |
| <b>G5E5A9</b>     | Fibronectin                                       | 271.952  | 25.14124294 | 2               | 321,4439662 |
| <b>P07589</b>     | Fibronectin                                       | 271.983  | 25.14124294 | 42              | 321,4439662 |
| <b>B8Y9T0</b>     | Fibronectin 1                                     | 248.974  | 26.54320988 | 21              | 318,3170657 |
| <b>P15497</b>     | Apolipoprotein A-I                                | 30.258   | 19.7564276  | 24              | 220,1763519 |
| <b>Q0VCM4</b>     | Glycogen phosphorylase                            | 97.394   | 19.72972973 | 38              | 220,1763519 |
| <b>F1MI18</b>     | Uncharacterized protein                           | 165.654  | 59.62264151 | 22              | 232,1050236 |
| <b>F1MJK3</b>     | Uncharacterized protein                           | 165.506  | 8.790035587 | 0               | 115,8492713 |
| <b>A0A140T897</b> | Serum albumin                                     | 69.278   | 8.796296296 | 19              | 115,8492713 |
| <b>P02769</b>     | Serum albumin                                     | 69.248   | 27.22371968 | 5               | 404,0782466 |
| <b>P23805</b>     | Conglutinin                                       | 37.971   | 26.1589404  | 3               | 873,9068512 |
| <b>P80457</b>     | Xanthine dehydrogenase/oxidase                    | 146.696  | 14,44444444 | 14              | 65,70898986 |
| <b>F1MUT3</b>     | Xanthine dehydrogenase/oxidase                    | 146.669  | 22,73476112 | 9               | 73,49145103 |
| <b>B0JYQ0</b>     | ALB protein                                       | 69.248   | 22,73476112 | 15              | 73,49145103 |
| <b>F1MVP0</b>     | ADAM metalloproteinase with thrombospondin type 1 | 151.374  | 48,55769231 | 13              | 119,6688337 |
| <b>F1N0R5</b>     | von Willebrand factor                             | 307.475  | 15,57377049 | 0               | 100,6843615 |
| <b>F1MAV0</b>     | Fibrinogen beta chain                             | 56.405   | 13,41880342 | 12              | 62,5247829  |
| <b>E1BH06</b>     | Uncharacterized protein                           | 192.644  | 30,3030303  | 10              | 52,56129336 |
| <b>F5XVA9</b>     | von Willebrand factor                             | 307.745  | 32,05128205 | 5               | 52,56129336 |

| Code access       | Description*                                        | MW [kDa] | Coverage    | Unique peptides | Score       |
|-------------------|-----------------------------------------------------|----------|-------------|-----------------|-------------|
| <b>P02676</b>     | Fibrinogen beta chain                               | 53.306   | 20,59308072 | 6               | 62,91113496 |
| <b>F1MY85</b>     | Complement C5a anaphylatoxin                        | 188.927  | 13,60655738 | 3               | 100,6843615 |
| <b>V6F869</b>     | Apolipoprotein A-I-like                             | 23.629   | 44,6685879  | 12              | 108,6491276 |
| <b>A0A0F6QMJ3</b> | Complement component 5                              | 188.691  | 25,67324955 | 8               | 303,3408718 |
| <b>F1N3Q7</b>     | Apolipoprotein A-IV                                 | 42.963   | 8,737864078 | 0               | 71,69110668 |
| <b>Q32PJ2</b>     | Apolipoprotein A-IV                                 | 42.991   | 19,0070922  | 15              | 31,68743467 |
| <b>G3N0I4</b>     | Cytosol aminopeptidas                               | 54.047   | 13,95749569 | 10              | 111,2448874 |
| <b>P00727</b>     | Cytosol aminopeptidas                               | 56.254   | 26,31578947 | 3               | 33,63287568 |
| <b>Q693V9</b>     | Complement component 3d                             | 34.422   | 26,31578947 | 10              | 33,63287568 |
| <b>Q3MHL4</b>     | Adenosylhomocysteinase 3                            | 47.607   | 30,0330033  | 2               | 76,51224542 |
| <b>P00432</b>     | Catalase                                            | 59.878   | 12,44239631 | 9               | 25,84321988 |
| <b>Q7SIH1</b>     | Alpha-2-macroglobulin                               | 167.47   | 24,29048414 | 3               | 646,0610726 |
| <b>Q95KV5</b>     | Fibronectin                                         | 38.32    | 6,357388316 | 5               | 20,59954548 |
| <b>F1MQ37</b>     | Myosin heavy chain 9                                | 226.962  | 6,357388316 | 4               | 20,59954548 |
| <b>F1MD73</b>     | Uncharacterized protein                             | 189.978  | 4,975347378 | 8               | 20,59954548 |
| <b>A5PJE3</b>     | Fibrinogen alpha chain                              | 66.957   | 38,75       | 0               | 71,74341667 |
| <b>P02672</b>     | Fibrinogen alpha chain                              | 66.971   | 14,77477477 | 5               | 62,25517595 |
| <b>A5D9E9</b>     | Complement C1r subcomponent precursor               | 80.161   | 13,49593496 | 9               | 39,98661864 |
| <b>Q03247</b>     | Apolipoprotein                                      | 35.958   | 13,49593496 | 8               | 39,98661864 |
| <b>Q2TBU0</b>     | Haptoglobin                                         | 44.831   | 27,84810127 | 0               | 25,54059851 |
| <b>E1BI98</b>     | Collagen type VI alpha 1 chain                      | 108.603  | 27,84810127 | 4               | 25,54059851 |
| <b>G5E513</b>     | Uncharacterized protein                             | 49.939   | 27,84810127 | 6               | 25,54059851 |
| <b>A6QPX7</b>     | FGB protein (Fragment)                              | 37.907   | 28,48484848 | 8               | 30,96007919 |
| <b>P01030</b>     | Complement C4                                       | 101.817  | 28,18627451 | 9               | 267,9672889 |
| <b>E1B805</b>     | Uncharacterized protein                             | 187.149  | 28,96725441 | 12              | 267,9672889 |
| <b>G3X6K8</b>     | Haptoglobin                                         | 44.845   | 24,31289641 | 15              | 267,9672889 |
| <b>A0A140T881</b> | Apolipoprotein                                      | 36.017   | 10,21582734 | 7               | 32,74262905 |
| <b>G3N3D4</b>     | Potassium channel tetramerization domain containing | 35.701   | 10,30478955 | 7               | 32,74262905 |
| <b>A7YWR0</b>     | Apolipoprotein                                      | 36.051   | 14,4469526  | 19              | 38,56606507 |
| <b>E1BFN6</b>     | Dihydropyrimidinase                                 | 56.267   | 14,71264368 | 20              | 38,56606507 |
| <b>P81187</b>     | Complement factor B                                 | 85.312   | 27,154047   | 0               | 227,8457786 |
| <b>P17697</b>     | Clusterin                                           | 51.081   | 17,30418944 | 13              | 42,44953275 |
| <b>F1N076</b>     | Ceruloplasmin                                       | 123.731  | 36,24454148 | 7               | 32,37882257 |

| Code access   | Description*                             | MW [kDa] | Coverage    | Unique peptides | Score       |
|---------------|------------------------------------------|----------|-------------|-----------------|-------------|
| <b>R9QSM8</b> | Alpha-2-macroglobulin                    | 133.302  | 25,43520309 | 2               | 505,1839079 |
| <b>F1N514</b> | CD5 antigen-like precursor               | 50.305   | 32,38512035 | 0               | 770,8895055 |
| <b>Q3SZZ9</b> | FGG protein                              | 49.136   | 22,92993631 | 12              | 60,16956151 |
| <b>Q0VCX1</b> | Complement C1s subcomponent              | 76.56    | 5,501618123 | 9               | 11,86303473 |
| <b>F1MJ12</b> | Complement C1s subcomponent              | 77.332   | 13,30798479 | 3               | 32,08415091 |
| <b>F1MGU7</b> | Fibrinogen gamma-B chain                 | 50.2     | 13,30798479 | 5               | 32,08415091 |
| <b>Q95KV4</b> | Fibronectin (Fragment)                   | 35.464   | 31,64556962 | 1               | 14,37422311 |
| <b>Q3Y5Z3</b> | Adiponectin                              | 26.117   | 11,03603604 | 0               | 33,17564273 |
| <b>Q0ZCB4</b> | Apolipoprotein                           | 27.057   | 27,27272727 | 3               | 148,6272044 |
| <b>A2VDY5</b> | Hydroxysteroid (17-beta)                 | 28.378   | 20,38834951 | 9               | 65,30266976 |
| <b>Q9MYP6</b> | 17-beta-hydroxysteroid dehydrogenas      | 28.404   | 25,41666667 | 19              | 22,7700392  |
| <b>A6QNW7</b> | CD5L protein                             | 50.179   | 10,93394077 | 5               | 23,2725662  |
| <b>Q0P5J7</b> | Keratin. type I cuticular Ha5            | 49.905   | 12,14128035 | 21              | 87,20624363 |
| <b>B7FEK7</b> | 43kDa collectin                          | 33.594   | 12,19512195 | 18              | 87,20624363 |
| <b>E1BPW6</b> | Keratin. type I cuticular Ha5            | 49.739   | 10,54347826 | 7               | 51,87173843 |
| <b>Q28178</b> | Thrombospondin-1                         | 129.451  | 28,76106195 | 5               | 551,6399485 |
| <b>A7E3W2</b> | Galectin-3-binding protein               | 62.087   | 8,333333333 | 10              | 14,14523625 |
| <b>F1MKG2</b> | Collagen type VI alpha 2 chain           | 109.253  | 17,81376518 | 3               | 26,02097392 |
| <b>B8Y898</b> | Malic enzyme                             | 63.853   | 12,40875912 | 6               | 23,08411241 |
| <b>P02663</b> | Alpha-S2-casein                          | 26.002   | 7,755775578 | 7               | 24,12152457 |
| <b>F1MC11</b> | Keratin. type I cytoskeletal 14          | 51.879   | 48,59813084 | 9               | 65,37755024 |
| <b>A6QNZ7</b> | Keratin 10                               | 54.816   | 5,176767677 | 10              | 9,596704483 |
| <b>P12799</b> | Fibrinogen gamma-B chain                 | 50.212   | 12,43654822 | 23              | 11,27226317 |
| <b>Q3SYR8</b> | Immunoglobulin J chain                   | 17.846   | 9,009009009 | 0               | 5,487135172 |
| <b>F1N3A1</b> | Thrombospondin-1                         | 129.309  | 9,009009009 | 1               | 5,487135172 |
| <b>A7E3D5</b> | Proteasome subunit alpha type (Fragment) | 26.551   | 4,856512141 | 0               | 10,87347269 |
| <b>K4JR81</b> | Alpha-2-macroglobulin variant 12         | 61.673   | 4,856512141 | 3               | 10,87347269 |
| <b>Q3ZBG0</b> | Proteasome subunit alpha type-7          | 27.852   | 8,411214953 | 2               | 126,5844053 |
| <b>F1MSZ6</b> | Antithrombin-III OS=Bos taurus           | 52.407   | 11,02040816 | 9               | 126,5844053 |
| <b>P00735</b> | Prothrombin                              | 70.461   | 36,24733475 | 4               | 260,5843923 |
| <b>F1MFY6</b> | Collectin-43 precursor                   | 24.905   | 34,70437018 | 3               | 846,0876623 |
| <b>Q58D62</b> | Fetuin-B                                 | 42.636   | 3,310613437 | 0               | 7,906161785 |
| <b>P06394</b> | Keratin. type I cytoskeletal 10          | 54.815   | 6,204379562 | 2               | 6,61307168  |

| Code access       | Description*                            | MW [kDa] | Coverage    | Unique peptides | Score       |
|-------------------|-----------------------------------------|----------|-------------|-----------------|-------------|
| <b>Q3SZJ0</b>     | Argininosuccinate lyase                 | 52.71    | 4,744525547 | 0               | 6,086005092 |
| <b>G5E5C3</b>     | Proteasome subunit alpha type           | 27.267   | 10,57692308 | 1               | 4,239753962 |
| <b>F1MM86</b>     | Complement component C6                 | 104.455  | 2,702702703 | 7               | 3,410375118 |
| <b>G3N0V2</b>     | Keratin 1                               | 63.113   | 11,07954545 | 0               | 4,860876799 |
| <b>O02808</b>     | Von Willebrand factor (Fragment)        | 59.57    | 11,07954545 | 9               | 4,860876799 |
| <b>Q3SYT3</b>     | Complement C1r subcomponent precursor   | 44.528   | 5,113636364 | 10              | 7,11321342  |
| <b>Q2YDE4</b>     | Proteasome subunit alpha type-6         | 27.382   | 11,11111111 | 0               | 6,825133801 |
| <b>F1MTV7</b>     | Argininosuccinate lyase                 | 52.682   | 11,11111111 | 1               | 6,825133801 |
| <b>B8YB77</b>     | Malic enzyme                            | 63.332   | 5,812417437 | 4               | 7,035996199 |
| <b>G3X6N3</b>     | Serotransferrin                         | 77.616   | 5,812417437 | 3               | 7,035996199 |
| <b>E1BFG1</b>     | Uncharacterized protein                 | 50.005   | 4,756871036 | 0               | 11,78225541 |
| <b>F1MRZ6</b>     | Tenascin C                              | 244.461  | 4,756871036 | 4               | 11,78225541 |
| <b>G5E5T5</b>     | Uncharacterized protein                 | 42.442   | 5,113636364 | 1               | 7,11321342  |
| <b>Q3SYR5</b>     | Apolipoprotein C-IV                     | 14.428   | 5,38573508  | 2               | 4,48806572  |
| <b>Q29RU4</b>     | Complement component C6                 | 104.473  | 23,07692308 | 1               | 11,25674486 |
| <b>Q3T063</b>     | Nicotinate-nucleotide pyrophosphorylase | 31.131   | 4,347826087 | 2               | 4,48806572  |
| <b>E1BL29</b>     | Bleomycin hydrolase                     | 52.896   | 6,532663317 | 0               | 27,89325523 |
| <b>Q29443</b>     | Serotransferrin                         | 77.703   | 20,15503876 | 2               | 3,950842738 |
| <b>F1MHB8</b>     | Nicotinate-nucleotide pyrophosphorylase | 31.165   | 8,558558559 | 2               | 1,680921078 |
| <b>P41361</b>     | Antithrombin-III                        | 52.314   | 12,5        | 1               | 110,3163168 |
| <b>Q71U44</b>     | Fibronectin (Fragment)                  | 45.802   | 17,59656652 | 1               | 109,0141351 |
| <b>A0JN60</b>     | Tenascin C                              | 190.961  | 20,47244094 | 2               | 5,039208889 |
| <b>E1BH94</b>     | Peptidoglycan recognition protein 2     | 59.793   | 23,95833333 | 0               | 7,306949139 |
| <b>F1MRZ5</b>     | Tenascin C                              | 191.032  | 6,28742515  | 2               | 4,237655163 |
| <b>Q2KIV9</b>     | Complement C1q subcomponent subunit B   | 26.383   | 6,290672451 | 0               | 7,969627857 |
| <b>Q28194</b>     | Thrombospondin-1                        | 25       | 1,493428913 | 2               | 4,015279174 |
| <b>Q9TUQ0</b>     | Anion exchange protein                  | 95.582   | 6,982543641 | 10              | 2,994791746 |
| <b>Q148H5</b>     | Keratin. type II cytoskeletal           | 57.372   | 7,00525394  | 2               | 16,71615529 |
| <b>Q32KL2</b>     | Proteasome subunit beta type-5          | 28.591   | 7,00525394  | 6               | 16,71615529 |
| <b>P63258</b>     | Actin. cytoplasmic 2                    | 41.766   | 4,22832981  | 2               | 4,367512226 |
| <b>B5B3R8</b>     | Alpha S1 casein                         | 24.427   | 4,22832981  | 0               | 4,367512226 |
| <b>A0A1B0Z542</b> | Heat shock 27 kDa protein 1             | 22.231   | 1,431127013 | 3               | 4,702090144 |
| <b>Q9XSW5</b>     | Anion exchange protein                  | 104.308  | 5,735660848 | 0               | 9,489186764 |

| Code access       | Description*                                   | MW [kDa] | Coverage    | Unique peptides | Score       |
|-------------------|------------------------------------------------|----------|-------------|-----------------|-------------|
| <b>F1MNW4</b>     | Inter-alpha-trypsin inhibitor heavy chain H2   | 106.09   | 5,735660848 | 3               | 9,489186764 |
| <b>Q3MHF7</b>     | S-methyl-5'-thioadenosine phosphorylase        | 31.236   | 3,565062389 | 2               | 4,589993954 |
| <b>F1N3V0</b>     | Malic enzyme                                   | 63.746   | 3,584229391 | 1               | 4,589993954 |
| <b>F1MYN5</b>     | Fibulin-1                                      | 77.434   | 2,253855279 | 0               | 4,057821274 |
| <b>A5D7S8</b>     | Fibulin-1                                      | 77.478   | 2,253855279 | 3               | 4,057821274 |
| <b>A0A1C9EIX3</b> | Heat shock protein family B member 1 variant 1 | 22.351   | 2,549575071 | 12              | 4,26041913  |
| <b>Q58DP7</b>     | Heat shock 27kDa protein 1                     | 17.545   | 2,549575071 | 0               | 4,26041913  |
| <b>E9RHW1</b>     | Heat shock 27kDa protein 1                     | 22.379   | 18,46153846 | 1               | 6,605324507 |
| <b>Q3T0X5</b>     | Proteasome subunit alpha type-1                | 29.567   | 18,46153846 | 0               | 6,605324507 |
| <b>P02662</b>     | Alpha-S1-casein                                | 24.513   | 0,788643533 | 0               | 7,681156635 |
| <b>P60712</b>     | Actin. cytoplasmic 1                           | 41.71    | 1,947419669 | 2               | 7,787001133 |
| <b>P31976</b>     | Ezrin                                          | 68.717   | 7,733333333 | 1               | 7,858686447 |
| <b>Q3ZCK9</b>     | Proteasome subunit alpha type-4                | 29.465   | 7,733333333 | 0               | 7,858686447 |
| <b>Q9TUQ1</b>     | Anion exchange protein                         | 74.3     | 7,733333333 | 5               | 7,858686447 |
| <b>A0A1C9EIX6</b> | Heat shock protein family B member 1 variant 2 | 22.389   | 1,431127013 | 3               | 4,702090144 |
| <b>A5D984</b>     | Pyruvate kinase                                | 57.912   | 15,10791367 | 1               | 11,06255352 |
| <b>Q28085</b>     | Complement factor H                            | 140.282  | 12,93103448 | 2               | 12,63318157 |
| <b>F1MC45</b>     | Complement factor H precursor                  | 96.53    | 13,67521364 | 3               | 12,63318157 |
| <b>F1MRD0</b>     | Actin. cytoplasmic 1                           | 41.825   | 10          | 2               | 12,63318157 |
| <b>Q9BGI2</b>     | Peroxiredoxin-4                                | 30.722   | 12,76595744 | 0               | 12,63318157 |
| <b>Q3ZC87</b>     | Pyruvate kinase (Fragment)                     | 61.389   | 27,06222865 | 1               | 453,5852154 |
| <b>E1BEL7</b>     | Heat shock protein beta-1                      | 22.564   | 32,60869565 | 1               | 5,436547518 |
| <b>Q7M2T6</b>     | Band 3 anion transport protein (Fragments)     | 34.3     | 32,78688525 | 2               | 5,436547518 |
| <b>A5D7R6</b>     | ITIH2 protein                                  | 106.12   | 19,53125    | 1               | 5,436547518 |
| <b>G3X7S2</b>     | Heat shock protein beta-1                      | 17.432   | 32,78688525 | 1               | 5,436547518 |
| <b>Q1JQB0</b>     | Collagen type VI alpha 2 chain                 | 97.075   | 9,693877551 | 1               | 5,790735483 |
| <b>Q6T182</b>     | Sex hormone-binding globulin (Fragment)        | 40.069   | 6,181015453 | 0               | 6,662236333 |
| <b>Q29RQ1</b>     | Complement component C7                        | 93.029   | 19,35483871 | 2               | 12,07949877 |
| <b>G5E5H7</b>     | Uncharacterized protein                        | 19.898   | 16,02564103 | 0               | 5,436547518 |
| <b>K4JF16</b>     | Alpha-2-macroglobulin variant 23               | 101.296  | 16,25615764 | 1               | 21,39780414 |
| <b>Q2HJ86</b>     | Tubulin alpha-1D chain                         | 50.251   | 3,434610304 | 3               | 4,737163544 |
| <b>P81947</b>     | Tubulin alpha-1B chain                         | 50.12    | 2,599814299 | 5               | 2,994791746 |
| <b>A3KLR9</b>     | Superoxide dismutase [Cu-Zn]                   | 26.16    | 2,094240838 | 0               | 2,994791746 |

| Code access       | Description*                                 | MW [kDa] | Coverage    | Unique peptides | Score       |
|-------------------|----------------------------------------------|----------|-------------|-----------------|-------------|
| <b>E1BFN5</b>     | Uncharacterized protein                      | 78.333   | 24,12962557 | 1               | 674,8379145 |
| <b>Q1RML9</b>     | Platelet-activating factor acetylhydrolas    | 50.119   | 33,65442505 | 1               | 440,4326642 |
| <b>Q05B55</b>     | IGK protein                                  | 26.574   | 33,23299217 | 1               | 440,4326642 |
| <b>Q32KN8</b>     | Tubulin alpha-3 chain                        | 49.894   | 32,69114991 | 2               | 410,7775776 |
| <b>Q6KDN5</b>     | Complement component 3 (Fragment)            | 7.414    | 27,06325932 | 2               | 327,4399574 |
| <b>F1MNV5</b>     | Kininogen-1                                  | 48.391   | 25,14124294 | 0               | 321,4439662 |
| <b>Q17QL7</b>     | KRT15 protein                                | 48.969   | 25,14124294 | 0               | 321,4439662 |
| <b>K4JR88</b>     | Alpha-2-macroglobulin variant 22             | 77.345   | 26,54320988 | 2               | 318,3170657 |
| <b>B5B0D4</b>     | Major allergen beta-lactoglobulin            | 19.956   | 19,7564276  | 2               | 220,1763519 |
| <b>F1MH40</b>     | Uncharacterized protein                      | 26.318   | 19,72972973 | 1               | 220,1763519 |
| <b>K4JDR8</b>     | Alpha-2-macroglobulin variant 5              | 45.046   | 59,62264151 | 2               | 232,1050236 |
| <b>A1L595</b>     | Keratin. type I cytoskeletal 17              | 48.682   | 8,790035587 | 2               | 115,8492713 |
| <b>A0A140T8C8</b> | Kininogen-1                                  | 68.922   | 8,796296296 | 2               | 115,8492713 |
| <b>P01044</b>     | Kininogen-1                                  | 68.847   | 27,22371968 | 0               | 404,0782466 |
| <b>G3X6I0</b>     | Uncharacterized protein                      | 202.852  | 26,1589404  | 3               | 873,9068512 |
| <b>F1N045</b>     | Complement component C7                      | 92.929   | 14,44444444 | 2               | 65,70898986 |
| <b>Q2HJ49</b>     | Moesin                                       | 67.933   | 22,73476112 | 0               | 73,49145103 |
| <b>F2Z4C1</b>     | Tubulin alpha chain                          | 50.104   | 22,73476112 | 2               | 73,49145103 |
| <b>P81644</b>     | Apolipoprotein A-II                          | 11.195   | 48,55769231 | 3               | 119,6688337 |
| <b>A0A140T867</b> | Keratin. type I cytoskeletal 17              | 48.712   | 15,57377049 | 2               | 100,6843615 |
| <b>Q32LP2</b>     | Radixin                                      | 68.525   | 13,41880342 | 3               | 62,5247829  |
| <b>F1MMP5</b>     | Inter-alpha-trypsin inhibitor heavy chain H1 | 101.174  | 30,3030303  | 0               | 52,56129336 |
| <b>A5PKC2</b>     | SHBG protein                                 | 43.288   | 32,05128205 | 2               | 52,56129336 |
| <b>P56652</b>     | Inter-alpha-trypsin inhibitor heavy chain H3 | 99.489   | 20,59308072 | 1               | 62,91113496 |
| <b>F6RP72</b>     | Tubulin alpha chain                          | 49.797   | 13,60655738 | 2               | 100,6843615 |
| <b>Q28017</b>     | Platelet-activating factor acetylhydrolas    | 50.101   | 44,6685879  | 1               | 108,6491276 |
| <b>O46415</b>     | Ferritin light chain                         | 19.975   | 25,67324955 | 0               | 303,3408718 |
| <b>M0QVY0</b>     | Uncharacterized protein                      | 60.767   | 8,737864078 | 1               | 71,69110668 |
| <b>E1BD83</b>     | Proteasome subunit alpha type                | 29.184   | 19,0070922  | 1               | 31,68743467 |
| <b>O02717</b>     | Non-muscle myosin heavy chain (Fragment)     | 72.327   | 13,95749569 | 1               | 111,2448874 |
| <b>Q27991</b>     | Myosin-10                                    | 228.958  | 26,31578947 | 1               | 33,63287568 |
| <b>P01966</b>     | Hemoglobin subunit alpha                     | 15.175   | 26,31578947 | 1               | 33,63287568 |
| <b>G5E604</b>     | Uncharacterized protein                      | 11.051   | 30,0330033  | 3               | 76,51224542 |

| Code access   | Description*                                 | MW [kDa] | Coverage    | Unique peptides | Score       |
|---------------|----------------------------------------------|----------|-------------|-----------------|-------------|
| <b>P02754</b> | Beta-lactoglobulin                           | 19.87    | 12,44239631 | 1               | 25,84321988 |
| <b>K4JBA2</b> | Alpha-2-macroglobulin variant 9              | 43.75    | 24,29048414 | 2               | 646,0610726 |
| <b>A4FV94</b> | KRT6A protein                                | 60.783   | 6,357388316 | 0               | 20,59954548 |
| <b>B0JYP6</b> | IGK protein                                  | 26.304   | 6,357388316 | 1               | 20,59954548 |
| <b>K4JBR5</b> | Alpha-2-macroglobulin variant 1              | 115.118  | 4,975347378 | 0               | 20,59954548 |
| <b>Q0VCM5</b> | Inter-alpha-trypsin inhibitor heavy chain H1 | 101.173  | 38,75       | 0               | 71,74341667 |
| <b>P01045</b> | Kininogen-2                                  | 68.666   | 14,77477477 | 1               | 62,25517595 |
| <b>Q2TBX6</b> | Proteasome subunit beta type-1               | 26.229   | 13,49593496 | 0               | 39,98661864 |
| <b>Q05443</b> | Lumican                                      | 38.732   | 13,49593496 | 2               | 39,98661864 |
| <b>G3N0S9</b> | Uncharacterized protein                      | 22.321   | 27,84810127 | 1               | 25,54059851 |
| <b>P34955</b> | Alpha-1-antiproteinase                       | 46.075   | 27,84810127 | 1               | 25,54059851 |
| <b>P19035</b> | Apolipoprotein C-III                         | 10.685   | 27,84810127 | 1               | 25,54059851 |
| <b>F1MZ96</b> | Uncharacterized protein                      | 26.545   | 28,48484848 | 1               | 30,96007919 |
| <b>P33672</b> | Proteasome subunit beta type-3               | 22.977   | 28,18627451 | 2               | 267,9672889 |
| <b>E1BB91</b> | Collagen type VI alpha 3 chain               | 342.197  | 28,96725441 | 1               | 267,9672889 |
| <b>F2Z4K0</b> | Tubulin alpha chain                          | 49.928   | 24,31289641 | 1               | 267,9672889 |
| <b>P63103</b> | 14-3-3 protein zeta/delta                    | 27.728   | 10,21582734 | 1               | 32,74262905 |
| <b>F1MJJ8</b> | Radixin                                      | 68.541   | 10,30478955 | 4               | 32,74262905 |
| <b>G5E589</b> | Proteasome subunit beta type                 | 26.301   | 14,4469526  | 0               | 38,56606507 |
| <b>Q3ZCJ7</b> | Tubulin alpha-1C chain                       | 49.825   | 14,71264368 | 1               | 38,56606507 |
| <b>Q32LE5</b> | Isoaspartyl peptidase/L-asparaginase         | 32.03    | 27,154047   | 2               | 227,8457786 |
| <b>K4JDS3</b> | Alpha-2-macroglobulin variant 10             | 52.304   | 17,30418944 | 2               | 42,44953275 |
| <b>Q687I9</b> | Purine nucleoside phosphorylase              | 32.046   | 36,24454148 | 1               | 32,37882257 |
| <b>F1MVJ8</b> | Olfactomedin 4                               | 57.76    | 25,43520309 | 0               | 505,1839079 |
| <b>F1MJH1</b> | Gelsolin                                     | 80.653   | 32,38512035 | 1               | 770,8895055 |
| <b>G3X8C8</b> | Uncharacterized protein                      | 25.166   | 22,92993631 | 0               | 60,16956151 |
| <b>P62739</b> | Actin, aortic smooth muscle                  | 41.982   | 5,501618123 | 4               | 11,86303473 |
| <b>Q28921</b> | Alpha 1-antichymotrypsin (Fragment)          | 28.553   | 13,30798479 | 3               | 32,08415091 |
| <b>Q28007</b> | Dihydropyrimidine dehydrogenase [NADP(+)]    | 111.625  | 13,30798479 | 2               | 32,08415091 |
| <b>Q3SX14</b> | Gelsolin                                     | 80.681   | 31,64556962 | 1               | 14,37422311 |
| <b>Q9XTA3</b> | Myocilin                                     | 54.853   | 11,03603604 | 1               | 33,17564273 |
| <b>A2I7M9</b> | Serpin A3-2                                  | 46.208   | 27,27272727 | 1               | 148,6272044 |
| <b>B0JYK6</b> | Alpha-1.4 glucan phosphorylase               | 97.227   | 20,38834951 | 2               | 65,30266976 |

| Code access       | Description*                                                                   | MW [kDa] | Coverage    | Unique peptides | Score       |
|-------------------|--------------------------------------------------------------------------------|----------|-------------|-----------------|-------------|
| <b>Q1JPD0</b>     | Complement component 8. alpha polypeptide                                      | 32.621   | 25,41666667 | 1               | 22,7700392  |
| <b>P80012</b>     | von Willebrand factor (Fragment)                                               | 102.531  | 10,93394077 | 1               | 23,2725662  |
| <b>Q862P9</b>     | Similar to beta actin (Fragment)                                               | 20.968   | 12,14128035 | 1               | 87,20624363 |
| <b>F1MKC4</b>     | Actin. gamma-enteric smooth muscle                                             | 41.898   | 12,19512195 | 0               | 87,20624363 |
| <b>Q2KIH5</b>     | Complement component 8. alpha polypeptide                                      | 66.292   | 10,54347826 | 3               | 51,87173843 |
| <b>G3MXU3</b>     | Collagen type VI alpha 2 chain                                                 | 24.991   | 28,76106195 | 2               | 551,6399485 |
| <b>G3N126</b>     | Collagen type VI alpha 3 chain                                                 | 134.797  | 8,333333333 | 0               | 14,14523625 |
| <b>A0A140T871</b> | Glutamate dehydrogenase 1. mitochondrial                                       | 61.592   | 17,81376518 | 1               | 26,02097392 |
| <b>Q58DU5</b>     | Proteasome subunit alpha type-3                                                | 28.387   | 12,40875912 | 4               | 23,08411241 |
| <b>F1MJ28</b>     | Alpha-1.4 glucan phosphorylase                                                 | 97.218   | 7,755775578 | 6               | 24,12152457 |
| <b>Q3T186</b>     | Ribose-5-phosphate isomerase                                                   | 28.735   | 48,59813084 | 3               | 65,37755024 |
| <b>Q8SPJ1</b>     | Junction plakoglobin                                                           | 81.769   | 5,176767677 | 0               | 9,596704483 |
| <b>A6QQC9</b>     | OLFM4 protein (Fragment)                                                       | 49.706   | 12,43654822 | 2               | 11,27226317 |
| <b>Q28908</b>     | Mucin (Fragment)                                                               | 54.83    | 9,009009009 | 2               | 5,487135172 |
| <b>F1MX87</b>     | Complement C8 alpha chain                                                      | 66.234   | 9,009009009 | 1               | 5,487135172 |
| <b>H9KUV2</b>     | S-methyl-5'-thioadenosine phosphorylase                                        | 32.883   | 4,856512141 | 0               | 10,87347269 |
| <b>G3N1U4</b>     | Serpin A3-3                                                                    | 46.127   | 4,856512141 | 1               | 10,87347269 |
| <b>F1MNF8</b>     | Tubulin alpha chain                                                            | 49.87    | 8,411214953 | 1               | 126,5844053 |
| <b>A3FJ56</b>     | Kappa casein (Fragment)                                                        | 17.836   | 11,02040816 | 1               | 126,5844053 |
| <b>Q705V4</b>     | Kappa-casein (Fragment)                                                        | 17.693   | 36,24733475 | 0               | 260,5843923 |
| <b>Q0VCX2</b>     | Endoplasmic reticulum chaperone BiP                                            | 72.356   | 34,70437018 | 3               | 846,0876623 |
| <b>A5D7L1</b>     | C-type lectin domain containing 11A                                            | 35.593   | 3,310613437 | 0               | 7,906161785 |
| <b>Q3T052</b>     | Inter-alpha-trypsin inhibitor heavy chain H4                                   | 101.449  | 6,204379562 | 2               | 6,61307168  |
| <b>F1N549</b>     | Dihydropyrimidine dehydrogenas                                                 | 111.766  | 4,744525547 | 4               | 6,086005092 |
| <b>G5E534</b>     | Ribose-5-phosphate isomerase                                                   | 32.82    | 10,57692308 | 3               | 4,239753962 |
| <b>Q3ZC07</b>     | Actin. alpha cardiac muscle                                                    | 41.992   | 2,702702703 | 2               | 3,410375118 |
| <b>Q2KJF1</b>     | Alpha-1B-glycoprotein                                                          | 53.52    | 11,07954545 | 3               | 4,860876799 |
| <b>Q5EA67</b>     | Inter-alpha (Globulin) inhibitor H4 (Plasma Kallikrein-sensitive glycoprotein) | 101.446  | 11,07954545 | 2               | 4,860876799 |
| <b>Q3B7M9</b>     | Glycogen phosphorylase                                                         | 96.279   | 5,113636364 | 1               | 7,11321342  |
| <b>F1N1I6</b>     | Gelsolin                                                                       | 85.634   | 11,11111111 | 3               | 6,825133801 |
| <b>O46375</b>     | Transthyretin                                                                  | 15.717   | 11,11111111 | 5               | 6,825133801 |
| <b>F1N0I3</b>     | Coagulation factor V                                                           | 222.078  | 5,812417437 | 3               | 7,035996199 |



| Code access       | Description*                                      | MW [kDa] | Coverage    | Unique peptides | Score       |
|-------------------|---------------------------------------------------|----------|-------------|-----------------|-------------|
| <b>P02081</b>     | Hemoglobin fetal subunit beta                     | 15.849   | 5,812417437 | 2               | 7,035996199 |
| <b>P02668</b>     | Kappa-casein                                      | 21.256   | 4,756871036 | 3               | 11,78225541 |
| <b>B8YB76</b>     | Homogentisat                                      | 49.965   | 4,756871036 | 2               | 11,78225541 |
| <b>Q9TTE1</b>     | Serpin A3-1                                       | 46.208   | 5,113636364 | 3               | 7,11321342  |
| <b>P81948</b>     | Tubulin alpha-4A chain                            | 49.892   | 5,38573508  | 2               | 4,48806572  |
| <b>Q3SX06</b>     | Myocilin                                          | 54.854   | 23,07692308 | 3               | 11,25674486 |
| <b>F1MU24</b>     | Alpha-1.4 glucan phosphorylase                    | 76.125   | 4,347826087 | 3               | 4,48806572  |
| <b>P68138</b>     | Actin. alpha skeletal muscle                      | 42.024   | 6,532663317 | 2               | 27,89325523 |
| <b>F1MXQ3</b>     | FAM20C. golgi associated secretory pathway kinase | 61.848   | 20,15503876 | 1               | 3,950842738 |
| <b>A8YXZ2</b>     | C8G protein                                       | 25.272   | 8,558558559 | 2               | 1,680921078 |
| <b>A2I7N1</b>     | Serpin A3-5                                       | 46.368   | 12,5        | 0               | 110,3163168 |
| <b>Q3ZBS7</b>     | Vitronectin                                       | 53.541   | 17,59656652 | 1               | 109,0141351 |
| <b>D4QBB4</b>     | Globin A1                                         | 15.944   | 20,47244094 | 1               | 5,039208889 |
| <b>A5D7Q2</b>     | Uncharacterized protein                           | 51.638   | 23,95833333 | 1               | 7,306949139 |
| <b>M0QVZ6</b>     | Keratin. type II cytoskeletal 5                   | 60.629   | 6,28742515  | 1               | 4,237655163 |
| <b>Q2KIH3</b>     | HGD protein (Fragment)                            | 44.278   | 6,290672451 | 1               | 7,969627857 |
| <b>Q5E9B5</b>     | Actin. gamma-enteric smooth muscle                | 41.85    | 1,493428913 | 1               | 4,015279174 |
| <b>Q3ZEJ6</b>     | Serpin A3-3                                       | 46.297   | 6,982543641 | 1               | 2,994791746 |
| <b>Q58DT9</b>     | Alpha 2 actin                                     | 45.192   | 7,00525394  | 1               | 16,71615529 |
| <b>G3N1Y3</b>     | Uncharacterized protein                           | 12.966   | 7,00525394  | 1               | 16,71615529 |
| <b>G3MX98</b>     | Keratin 9                                         | 54.621   | 4,22832981  | 1               | 4,367512226 |
| <b>Q9MYV8</b>     | Haptoglobin (Fragment)                            | 11.232   | 4,22832981  | 1               | 4,367512226 |
| <b>G3N3E4</b>     | Collagen type VI alpha 3 chain                    | 185.721  | 1,431127013 | 1               | 4,702090144 |
| <b>Q32L76</b>     | Serum amyloid A-4 protein                         | 14.678   | 5,735660848 | 1               | 9,489186764 |
| <b>G8JKX4</b>     | Actin. aortic smooth muscle                       | 45.403   | 5,735660848 | 1               | 9,489186764 |
| <b>A0A0M4FJ17</b> | Kappa-casein (Fragment)                           | 16.015   | 3,565062389 | 1               | 4,589993954 |
| <b>P55859</b>     | Purine nucleoside phosphorylase                   | 32.016   | 3,584229391 | 1               | 4,589993954 |
| <b>F1N614</b>     | 78 kDa glucose-regulated protein precursor        | 66.224   | 2,253855279 | 1               | 4,057821274 |
| <b>A5D7M6</b>     | KRT5 protein                                      | 62.644   | 2,253855279 | 1               | 4,057821274 |
| <b>Q27983</b>     | Alpha1-antichymotrypsin isoform pHHK11 (Fragment) | 22.697   | 2,549575071 | 1               | 4,26041913  |
| <b>A6QPD4</b>     | LOC790886 protein                                 | 45.399   | 2,549575071 | 1               | 4,26041913  |
| <b>F1MMD7</b>     | Inter-alpha-trypsin inhibitor heavy chain H4      | 101.463  | 18,46153846 | 1               | 6,605324507 |
| <b>A4IFM8</b>     | Actin. alpha 1. skeletal muscle                   | 41.996   | 18,46153846 | 1               | 6,605324507 |

| Code access | Description*                               | MW [kDa] | Coverage    | Unique peptides | Score       |
|-------------|--------------------------------------------|----------|-------------|-----------------|-------------|
| A2I7N0      | Serpin A3-4                                | 46.282   | 0,788643533 | 1               | 7,681156635 |
| F1MLF8      | Homogentisat                               | 49.811   | 1,947419669 | 1               | 7,787001133 |
| P81265      | Polymeric immunoglobulin receptor          | 82.383   | 7,733333333 | 1               | 7,858686447 |
| A2I7N2      | Serpin A3-6                                | 46.361   | 7,733333333 | 1               | 7,858686447 |
| K4JB97      | Alpha-2-macroglobulin variant 4            | 42.306   | 7,733333333 | 1               | 7,858686447 |
| A0A140T8A9  | Kappa-casein                               | 21.224   | 1,431127013 | 1               | 4,702090144 |
| Q28107      | Coagulation factor V                       | 248.828  | 15,10791367 | 1               | 11,06255352 |
| Q0P5J4      | Keratin. type I cytoskeletal 25            | 49.282   | 10          | 1               | 12,63318157 |
| A5D7J0      | ACTA2 protein                              | 42.01    | 10          | 1               | 12,63318157 |
| P00366      | Glutamate dehydrogenas                     | 61.473   | 10          | 1               | 12,63318157 |
| Q3ZC00      | Lymphocyte cytosolic protein 1 (L-plastin) | 70.01    | 10          | 1               | 12,63318157 |
| Q148H6      | Keratin. type I cytoskeletal 28            | 50.744   | 27,06222865 | 1               | 453,5852154 |
| G8JKW7      | Uncharacterized protein                    | 46.315   | 32,60869565 | 1               | 5,436547518 |
| Q9MZ31      | Fibronectin variable region (Fragment)     | 20.365   | 32,78688525 | 1               | 5,436547518 |
| Q2HJB8      | Tubulin alpha-8 chain                      | 50.022   | 19,53125    | 1               | 5,436547518 |
| F1MYX5      | Lymphocyte cytosolic protein 1             | 70.068   | 32,78688525 | 1               | 5,436547518 |
| A6QNW3      | PIGR protein                               | 82.455   | 9,693877551 | 1               | 5,790735483 |
| Q5XQN5      | Keratin. type II cytoskeletal 5            | 62.898   | 6,181015453 | 1               | 6,662236333 |
| P79334      | Glycogen phosphorylase                     | 97.232   | 19,35483871 | 1               | 12,07949877 |
| Q3MHN2      | Complement component C9                    | 61.958   | 16,02564103 | 1               | 5,436547518 |

\*Classification given by author.
