# Supplementary material for: Extracellular vesicles in infectious diseases caused by protozoan parasites in buffaloes
Source: PubMed Central journal article supplement (PMC7262785; doi:10.1590/1678-9199-jvatitd-2019-0067), 2020-05-29
Supplement: 1678-9199-jvatitd-26-e20190067-s4.pdf [file 1678-9199-jvatitd-26-e20190067-s4.pdf]

## Supplementary Material to “Extracellular vesicles in infectious diseases caused by protozoan parasites in buffaloes”

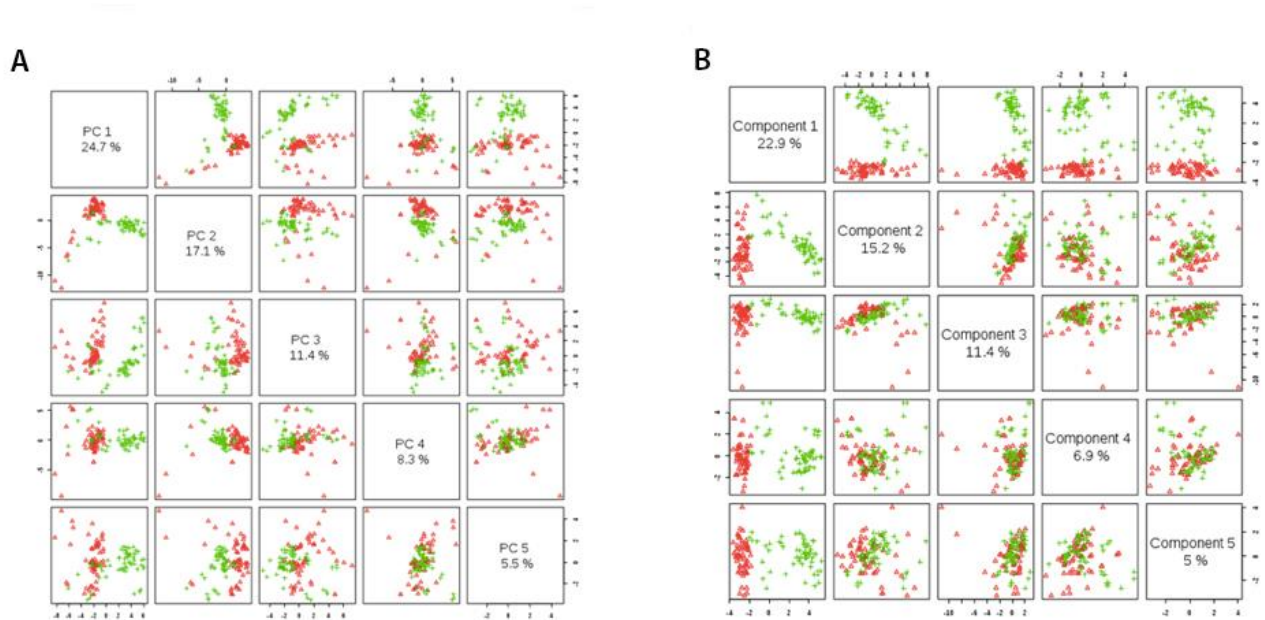

**Additional file 4.** Analysis of proteomic data in which control animals and *Theileria* spp. positive animals presented relevant statistical differences. **(A)** Principal component analysis (PCA). **(B)** Partial least squares (PSL).
