# Supplementary material for: Extracellular vesicles in infectious diseases caused by protozoan parasites in buffaloes
Source: PubMed Central journal article supplement (PMC7262785; doi:10.1590/1678-9199-jvatitd-2019-0067), 2020-05-29
Supplement: 1678-9199-jvatitd-26-e20190067-s5.pdf [file 1678-9199-jvatitd-26-e20190067-s5.pdf]

## Supplementary Material to “Extracellular vesicles in infectious diseases caused by protozoan parasites in buffaloes”

**Additional file 5.** Proteins identified with differential expression by fold change analysis

|   | <b>Protein</b>            | <b>Access code</b> | <b>Fold change</b> | <b>Log2 (FC)</b> |
|---|---------------------------|--------------------|--------------------|------------------|
| 1 | Creatine (phospho) kinase | Q9TTK8             | 0.049467           | -4.3419          |
| 2 | L-lactate dehydrogenase   | B0JYN3             | 0.091992           | -3.5690          |
| 3 | L-lactate dehydrogenase   | Q5E9B1             | 0.12563            | -3.2525          |
| 4 | L-lactate                 | P19858             | 0.12367            | -3.086           |
| 5 | Homocysteine              | Q5I597             | 0.13065            | -2.6352          |
