# Supplementary material for: Extracellular vesicles in infectious diseases caused by protozoan parasites in buffaloes
Source: PubMed Central journal article supplement (PMC7262785; doi:10.1590/1678-9199-jvatitd-2019-0067), 2020-05-29
Supplement: 1678-9199-jvatitd-26-e20190067-s6.pdf [file 1678-9199-jvatitd-26-e20190067-s6.pdf]

## Supplementary Material to “Extracellular vesicles in infectious diseases caused by protozoan parasites in buffaloes”

**Additional file 6.** Proteins identified with differential expression by t-tests

|   | <b>Protein</b>            | <b>Access code</b> | <b>t.stat</b> | <b>p value</b> | <b>-log10 (p)</b> | <b>FDR</b> |
|---|---------------------------|--------------------|---------------|----------------|-------------------|------------|
| 1 | Creatine (phospho) kinase | Q9TTK8             | -12.567       | 4.2136e-12     | 24.592            | 1.2465e-13 |
| 2 | L-lactate dehydrogenase   | B0JYN3             | -12.782       | 2.1985e-15     | 20.986            | 2.1591e-10 |
| 3 | L-lactate dehydrogenase   | Q5E9B1             | -11.696       | 2.1258e-11     | 21.512            | 2.1568e-11 |
| 4 | L-lactate                 | P19858             | -12.186       | 2.7674e-10     | 18.625            | 2.1025e-29 |
| 5 | Homocysteine              | Q5I597             | -11.955       | 2.1563e-29     | 19.121            | 1.2157e-28 |
